# Supplementary material for: Evidence and evolutionary analysis of ancient whole-genome duplication in barley predating the divergence from rice
Source: PubMed Central journal article supplement (PMC2746218; doi:10.1186/1471-2148-9-209), 2009-08-22
Supplement: 1471-2148-9-209-S1.pdf [file 1471-2148-9-209-S1.pdf]

# *Evidence and evolutionary analysis of ancient whole-genome duplication in barley predating the divergence from rice*

Thomas Thiel, Andreas Graner, Robbie Waugh, Ivo Grosse, Timothy J Close, Nils Stein

## Additional file 1

|                   |                                                                                                                   |              |
|-------------------|-------------------------------------------------------------------------------------------------------------------|--------------|
| <b>Figure S1:</b> | <b>Combined density plots for the distribution of subsets of rice genes</b>                                       | <b>2-4</b>   |
| <b>Table S1:</b>  | <b>Duplicated segments within the rice genome</b>                                                                 | <b>5</b>     |
| <b>Figure S2:</b> | <b>Duplicated segments within the rice genome</b>                                                                 | <b>6-17</b>  |
| <b>Table S2:</b>  | <b>Extent of rice segmental duplications and shared synteny with barley</b>                                       | <b>18</b>    |
| <b>Figure S3:</b> | <b>Shared synteny between barley and rice</b>                                                                     | <b>19</b>    |
| <b>Table S3:</b>  | <b>Shared synteny between barley and rice</b>                                                                     | <b>20</b>    |
| <b>Table S4:</b>  | <b>Shared ancestral duplications between barley and rice</b>                                                      | <b>21</b>    |
| <b>Figure S4:</b> | <b>Shared ancestral duplications between barley and rice</b>                                                      | <b>22</b>    |
| <b>Table S5:</b>  | <b>Positive correlation of shared synteny with barley and retention of WGD paralogs in rice</b>                   | <b>23</b>    |
| <b>Table S6:</b>  | <b>Comparison of location and extent of rice segmental duplications to previous studies</b>                       | <b>24</b>    |
| <b>Figure S5:</b> | <b>Comparison of location and extent of segmental duplications within the rice genome to two previous studies</b> | <b>25</b>    |
| <b>Table S7:</b>  | <b>Mean prediction errors of regression methods used for barley map integration</b>                               | <b>26</b>    |
| <b>Figure S6:</b> | <b>Regression plots for the integration of two barley genetic maps</b>                                            | <b>27-33</b> |

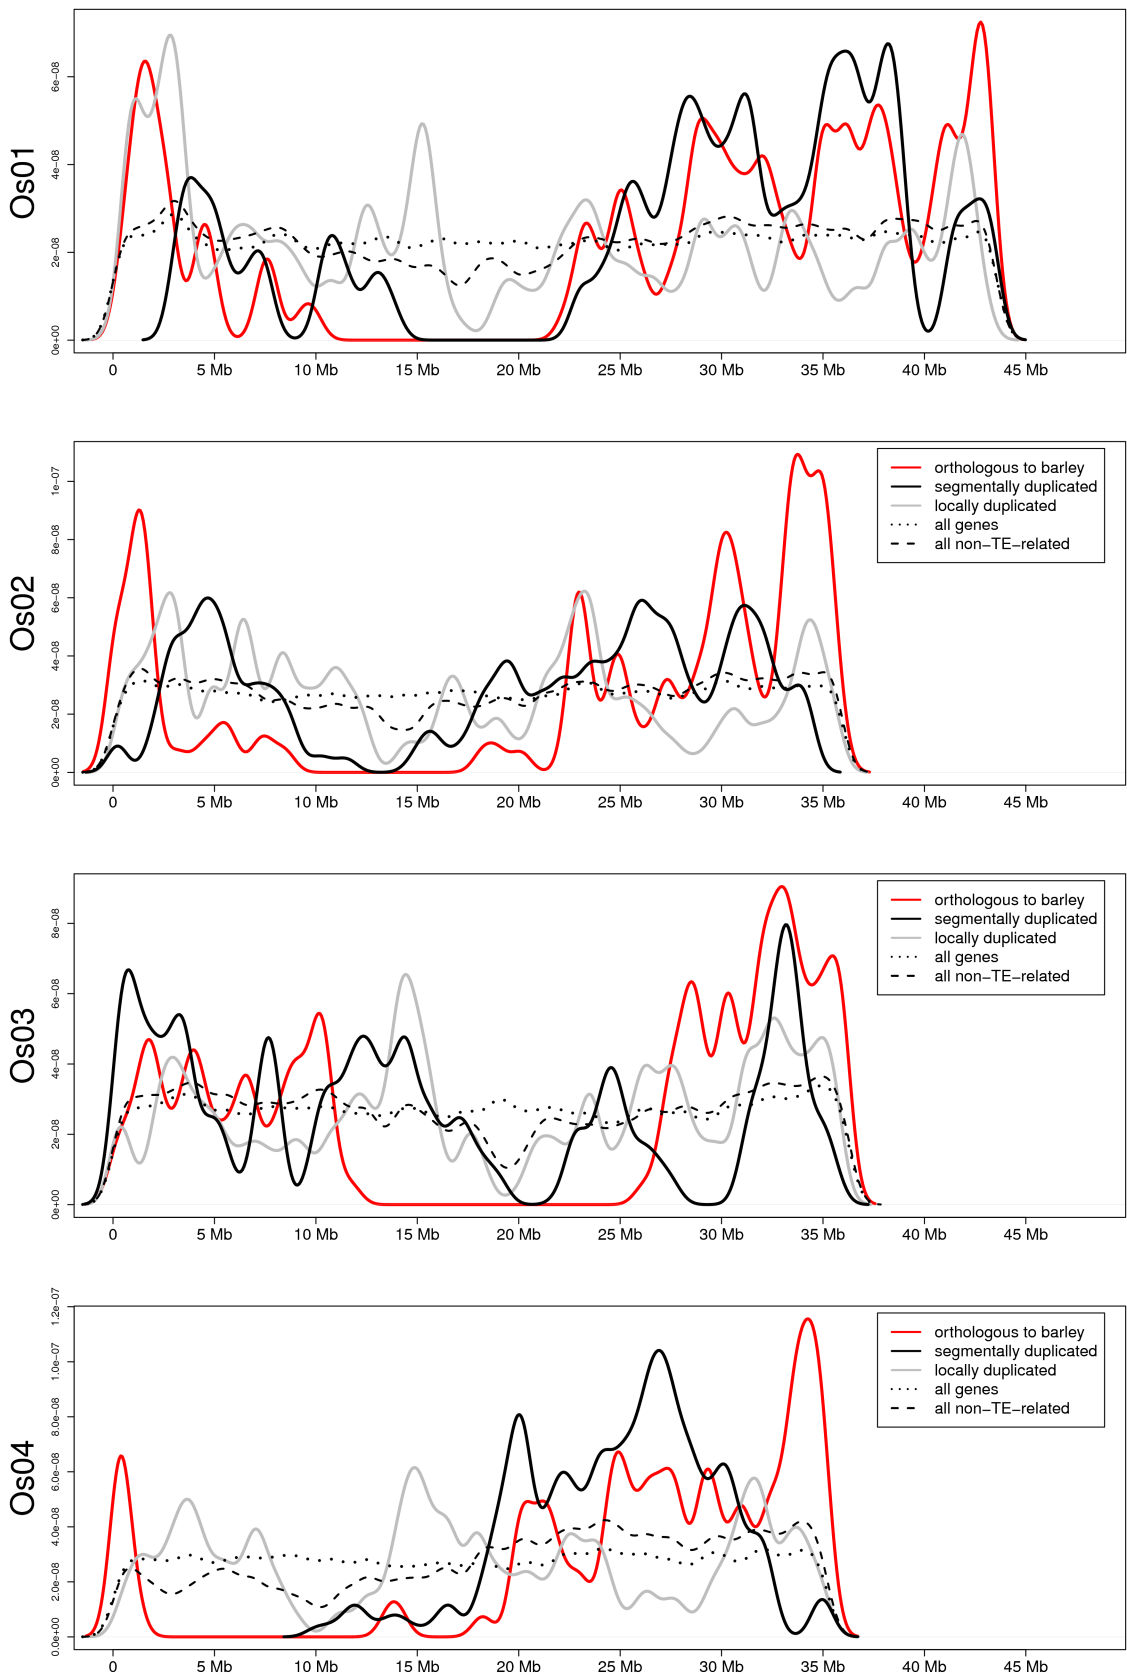

**Figure S1: Combined density plots for the distribution of subsets of rice genes.**

Density curves were computed along rice chromosomes Os01 – Os12 using a smoothing bandwidth of 0.5 Mb for the gene subsets (1) shared synteny with barley, (2) segmentally duplicated, (3) locally duplicated within the rice genome in comparison to all genes and all non-TE-related genes.

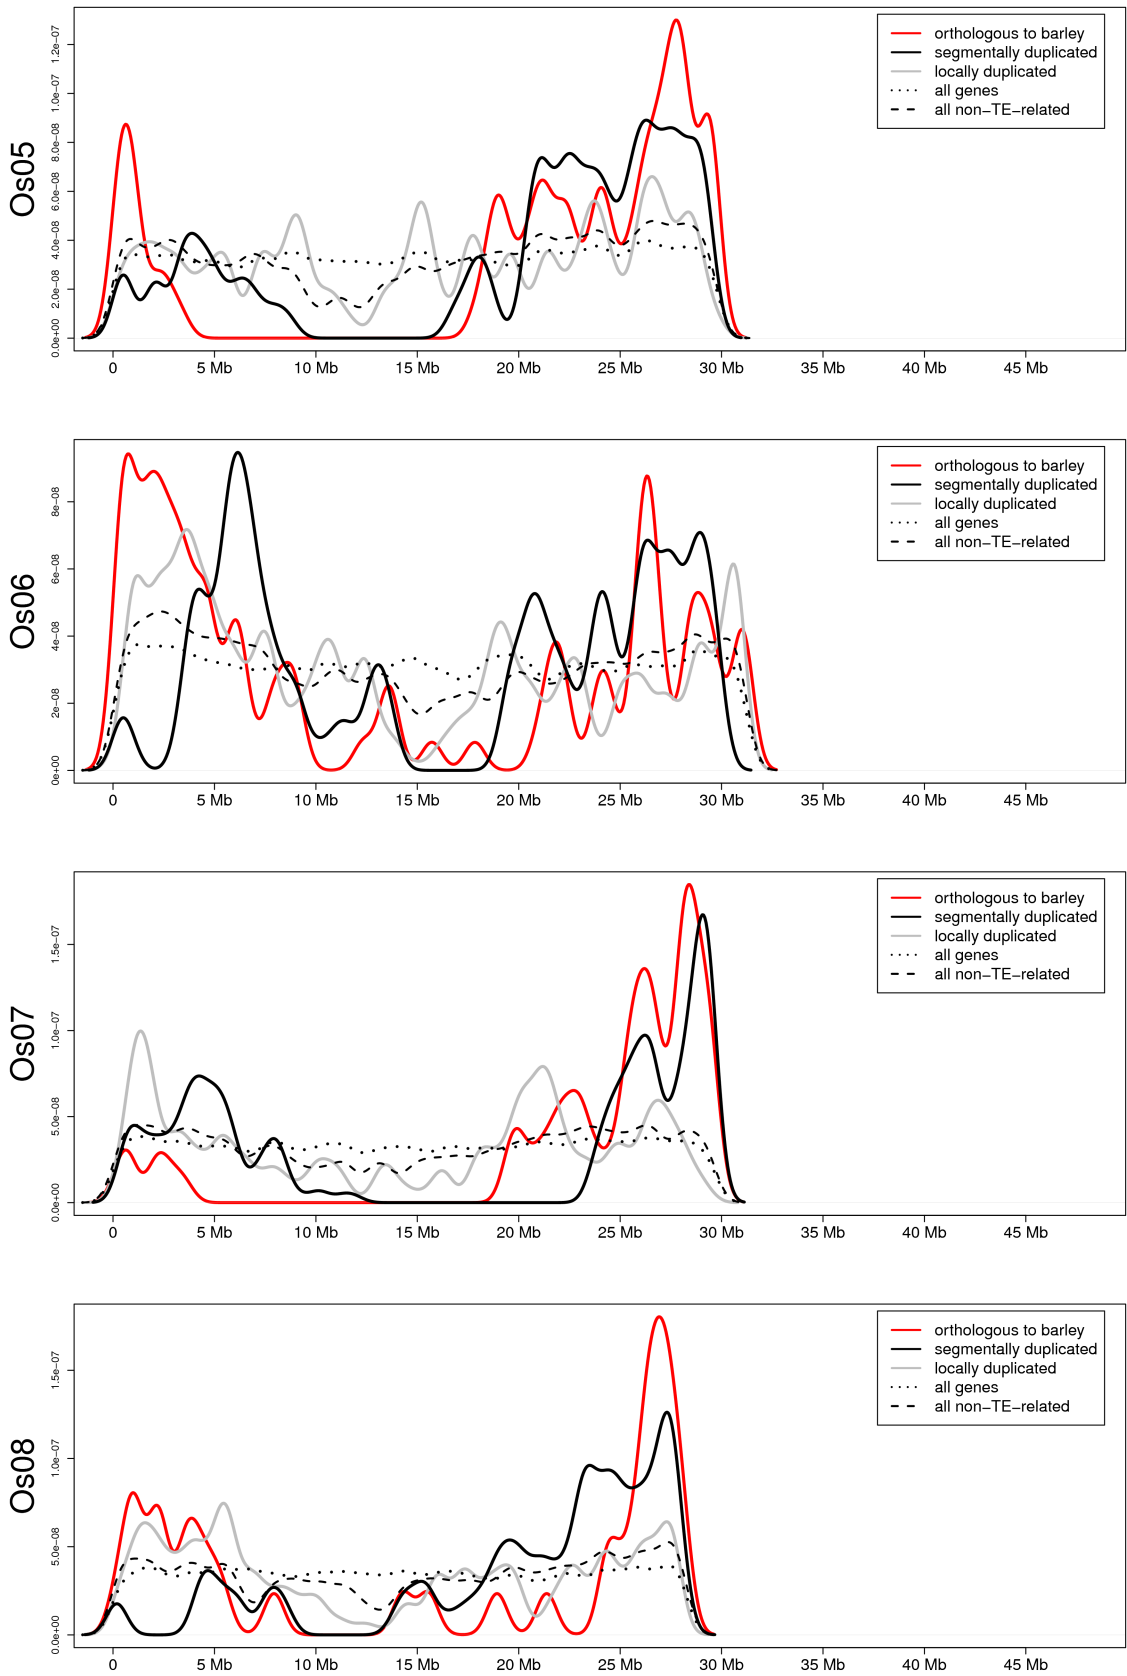

Figure S1 (continued)

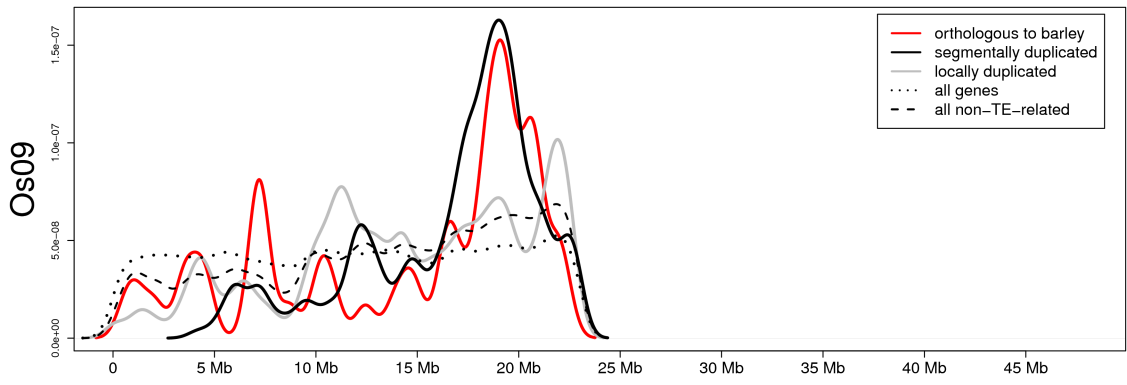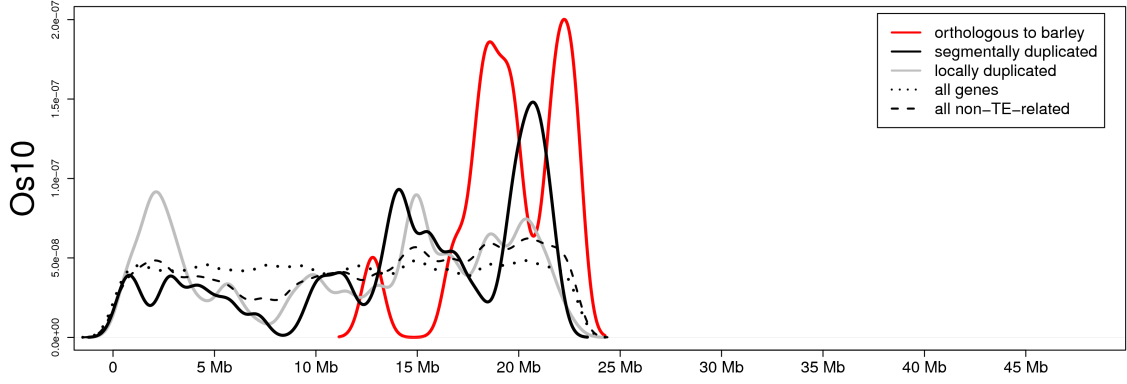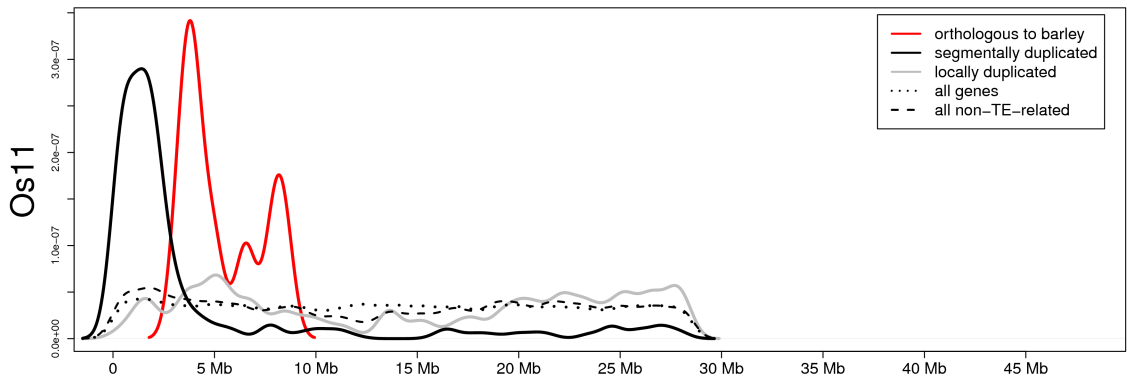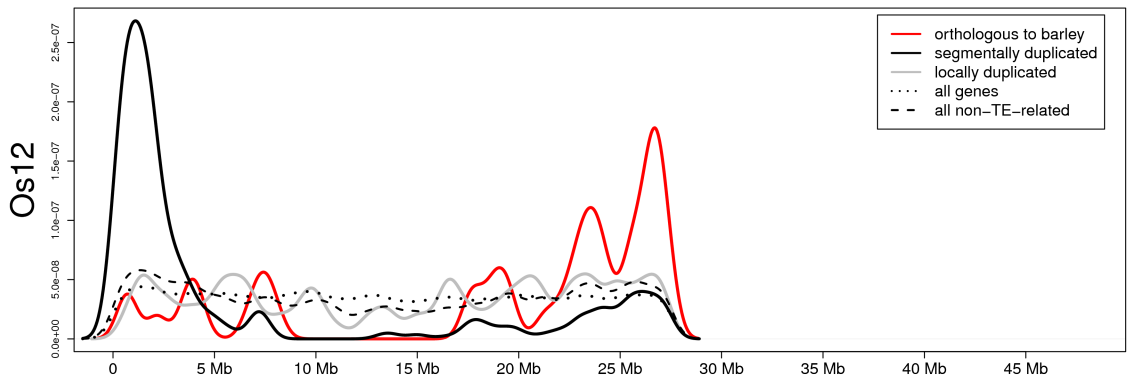

Figure S1 (continued)

**Table S1: Duplicated segments within the rice genome.**

| name      | segment 1       |               |               |             |               |              |                |                     |                 | segment 2     |               |             |               |              |                | nr duplicated       |       | Ks median <sup>2</sup> |
|-----------|-----------------|---------------|---------------|-------------|---------------|--------------|----------------|---------------------|-----------------|---------------|---------------|-------------|---------------|--------------|----------------|---------------------|-------|------------------------|
|           | chromo-<br>some | start<br>(Mb) | TIGR locus ID | end<br>(Mb) | TIGR locus ID | size<br>(Mb) | nr of<br>genes | ratio<br>duplicates | chromo-<br>some | start<br>(Mb) | TIGR locus ID | end<br>(Mb) | TIGR locus ID | size<br>(Mb) | nr of<br>genes | ratio<br>duplicates | genes |                        |
| os01_05_1 | Os01            | 3.0           | Os01g06270    | 7.7         | Os01g13770    | 4.7          | 704            | 10%                 | Os05            | 3.6           | Os05g06980    | 8.6         | Os05g15160    | 4.9          | 712            | 9%                  | 67    | < 2.2E-16              |
| os01_05_2 | Os01            | 10.2          | Os01g18240    | 11.2        | Os01g19694    | 1.0          | 136            | 10%                 | Os05            | 2.3           | Os05g04820    | 1.7         | Os05g03884    | 0.6          | 91             | 15%                 | 14    | < 2.2E-16              |
| os01_05_3 | Os01            | 11.2          | Os01g19760    | 11.9        | Os01g21320    | 0.7          | 103            | 8%                  | Os05            | 16.8          | Os05g28710    | 17.3        | Os05g29990    | 0.5          | 79             | 10%                 | 8     | < 2.2E-16              |
| os01_05_4 | Os01            | 12.6          | Os01g22520    | 14.0        | Os01g24880    | 1.4          | 218            | 6%                  | Os05            | 3.5           | Os05g06750    | 3.2         | Os05g06270    | 0.3          | 49             | 27%                 | 13    | < 2.2E-16              |
| os01_05_5 | Os01            | 22.8          | Os01g39780    | 39.1        | Os01g66820    | 16.4         | 2501           | 14%                 | Os05            | 29.5          | Os05g51540    | 20.2        | Os05g34270    | 9.3          | 1570           | 23%                 | 354   | < 2.2E-16              |
| os01_05_6 | Os01            | 41.2          | Os01g70580    | 42.6        | Os01g72790    | 1.4          | 210            | 12%                 | Os05            | 17.6          | Os05g30454    | 18.8        | Os05g32360    | 1.2          | 184            | 14%                 | 25    | < 2.2E-16              |
| os01_05_7 | Os01            | 42.6          | Os01g72890    | 43.5        | Os01g74510    | 0.9          | 161            | 11%                 | Os05            | 0.3           | Os05g01540    | 1.0         | Os05g02790    | 0.7          | 124            | 14%                 | 17    | < 2.2E-16              |
| os02_04_1 | Os02            | 14.7          | Os02g25230    | 28.9        | Os02g47410    | 14.3         | 2097           | 14%                 | Os04            | 10.6          | Os04g19140    | 30.2        | Os04g51370    | 19.6         | 2935           | 10%                 | 288   | < 2.2E-16              |
| os02_06_1 | Os02            | 0.1           | Os02g01270    | 0.3         | Os02g01520    | 0.2          | 27             | 26%                 | Os06            | 0.9           | Os06g02590    | 0.3         | Os06g01500    | 0.6          | 103            | 7%                  | 7     | < 2.2E-16              |
| os02_06_2 | Os02            | 1.9           | Os02g04230    | 9.0         | Os02g15880    | 7.1          | 1053           | 17%                 | Os06            | 30.0          | Os06g49430    | 19.3        | Os06g33180    | 10.6         | 1585           | 11%                 | 177   | < 2.2E-16              |
| os02_06_3 | Os02            | 10.0          | Os02g17350    | 11.7        | Os02g19860    | 1.7          | 244            | 3%                  | Os06            | 13.2          | Os06g22650    | 13.7        | Os06g23530    | 0.6          | 81             | 10%                 | 8     | < 2.2E-16              |
| os02_06_4 | Os02            | 29.5          | Os02g48190    | 34.3        | Os02g56140    | 4.9          | 788            | 17%                 | Os06            | 13.0          | Os06g22330    | 3.3         | Os06g06900    | 9.7          | 1447           | 9%                  | 132   | < 2.2E-16              |
| os03_07_1 | Os03            | 9.7           | Os03g17570    | 19.2        | Os03g33590    | 9.4          | 1399           | 10%                 | Os07            | 29.6          | Os07g49460    | 23.9        | Os07g39900    | 5.7          | 921            | 16%                 | 146   | < 2.2E-16              |
| os03_07_2 | Os03            | 31.1          | Os03g54850    | 35.7        | Os03g63330    | 4.6          | 805            | 13%                 | Os07            | 0.5           | Os07g01850    | 11.9        | Os07g20544    | 11.4         | 1737           | 6%                  | 102   | < 2.2E-16              |
| os03_10_1 | Os03            | 0.1           | Os03g01150    | 0.5         | Os03g01820    | 0.4          | 69             | 25%                 | Os10            | 21.9          | Os10g41340    | 21.0        | Os10g39810    | 0.9          | 145            | 12%                 | 17    | < 2.2E-16              |
| os03_10_2 | Os03            | 0.5           | Os03g01880    | 2.1         | Os03g04480    | 1.5          | 242            | 19%                 | Os10            | 17.7          | Os10g33900    | 21.0        | Os10g39790    | 3.3          | 526            | 9%                  | 46    | < 2.2E-16              |
| os03_10_3 | Os03            | 2.1           | Os03g04500    | 5.7         | Os03g11100    | 3.6          | 590            | 12%                 | Os10            | 17.2          | Os10g33290    | 9.4         | Os10g19190    | 7.7          | 1150           | 6%                  | 68    | < 2.2E-16              |
| os03_10_4 | Os03            | 6.6           | Os03g12550    | 8.2         | Os03g15050    | 1.6          | 236            | 15%                 | Os10            | 0.4           | Os10g01610    | 7.2         | Os10g13700    | 6.8          | 1026           | 3%                  | 35    | < 2.2E-16              |
| os03_12_1 | Os03            | 22.0          | Os03g39680    | 27.6        | Os03g48560    | 5.6          | 796            | 8%                  | Os12            | 23.8          | Os12g38740    | 27.4        | Os12g44240    | 3.6          | 540            | 11%                 | 61    | < 2.2E-16              |
| os08_04_1 | Os08            | 0.1           | Os08g01160    | 0.3         | Os08g01410    | 0.2          | 27             | 22%                 | Os04            | 34.7          | Os04g58760    | 35.2        | Os04g59550    | 0.5          | 75             | 8%                  | 6     | < 2.2E-16              |
| os08_04_2 | Os08            | 4.1           | Os08g07400    | 8.6         | Os08g14330    | 4.4          | 671            | 5%                  | Os04            | 32.5          | Os04g55030    | 30.2        | Os04g51390    | 2.3          | 365            | 10%                 | 35    | < 2.2E-16              |
| os08_09_1 | Os08            | 13.8          | Os08g23150    | 28.1        | Os08g45010    | 14.3         | 2120           | 11%                 | Os09            | 4.2           | Os09g08130    | 22.9        | Os09g39910    | 18.7         | 2814           | 8%                  | 228   | < 2.2E-16              |
| os11_12_1 | Os11            | 0.0           | Os11g01020    | 12.0        | Os11g20790    | 12.0         | 1817           | 19%                 | Os12            | 0.0           | Os12g01010    | 7.5         | Os12g13380    | 7.5          | 1188           | 30%                 | 352   | < 2.2E-16              |
| os11_12_2 | Os11            | 15.9          | Os11g28520    | 28.1        | Os11g47460    | 12.2         | 1742           | 2%                  | Os12            | 13.3          | Os12g23490    | 23.3        | Os12g37970    | 10.0         | 1379           | 3%                  | 40    | < 2.2E-16              |

<sup>1</sup> one-sided Fisher test, see Methods for details<sup>2</sup> median Ks ratios for the ten largest duplicated blocks in the rice genome

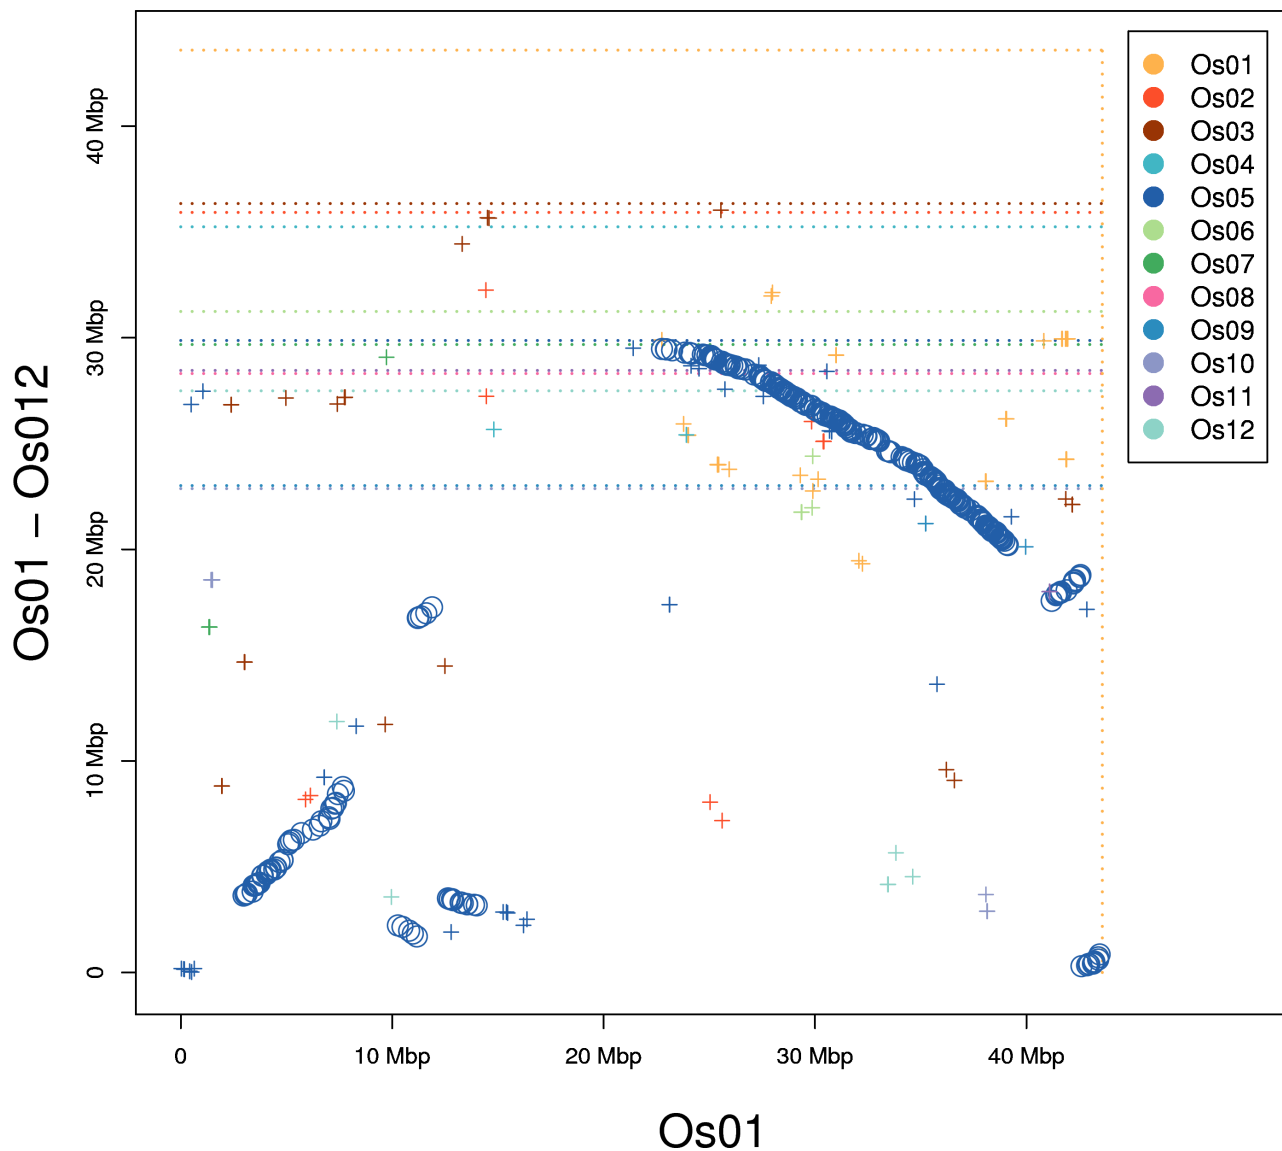

**Figure S2: Duplicated segments within the rice genome.** For each chromosome (Os01 – Os12), coordinates of duplicated genes located elsewhere within the rice genome, as indicated by color-codes, were plotted against each other after automatically removing local duplications and ‘background’ noise (see Methods). Gene pairs assigned to duplicated segments are indicated by circles.

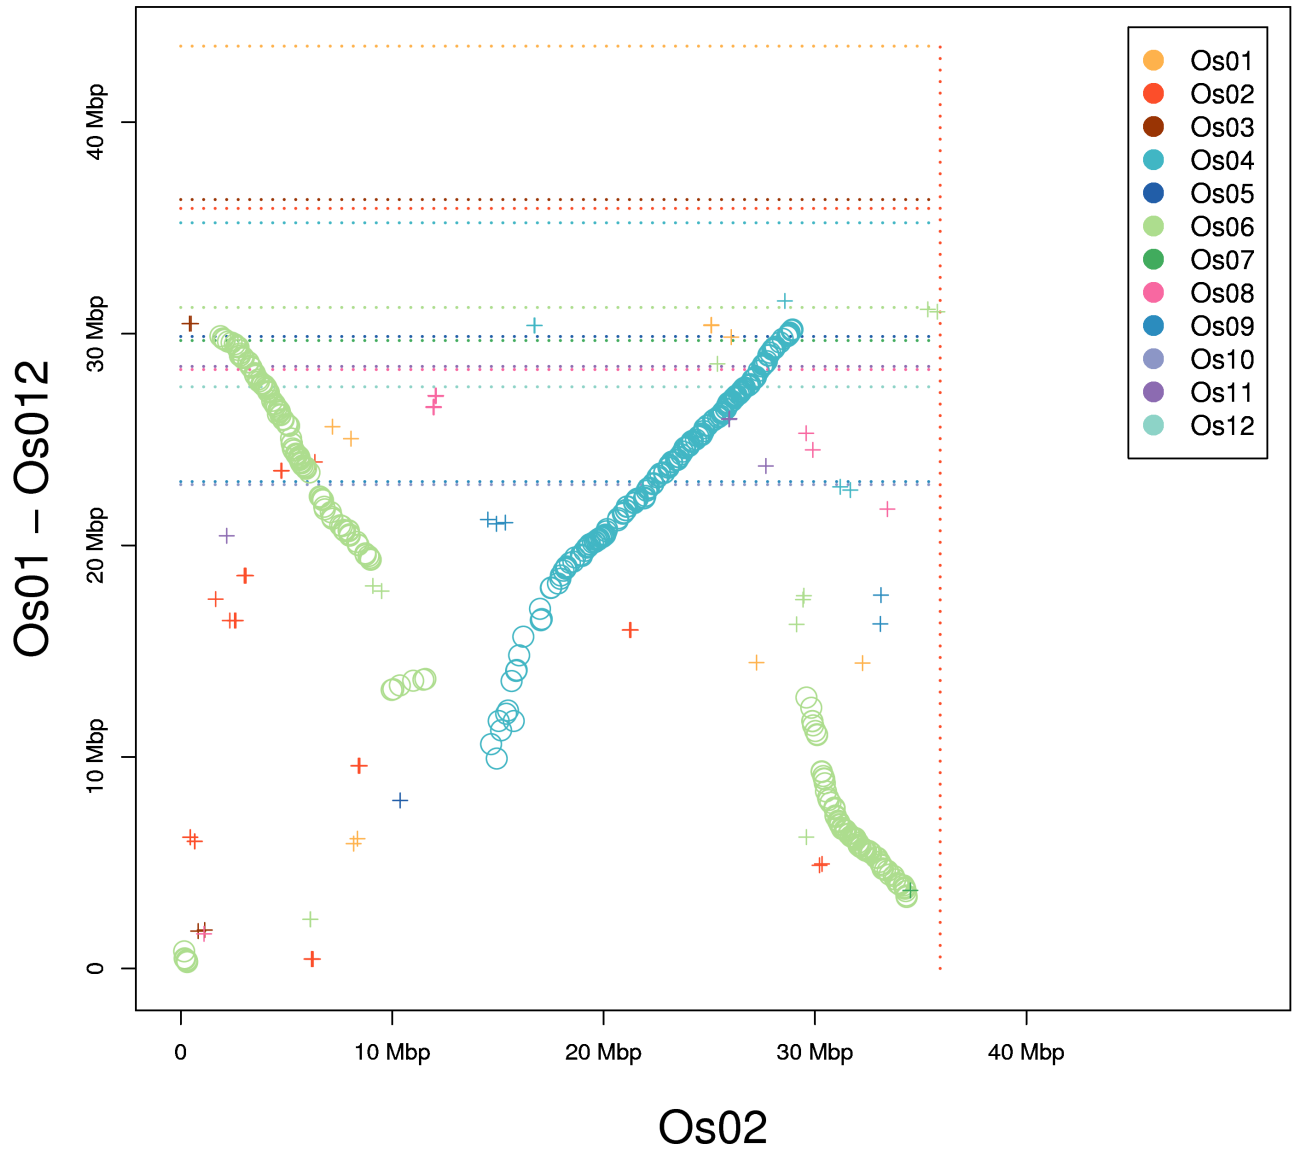

Figure S2 (continued)

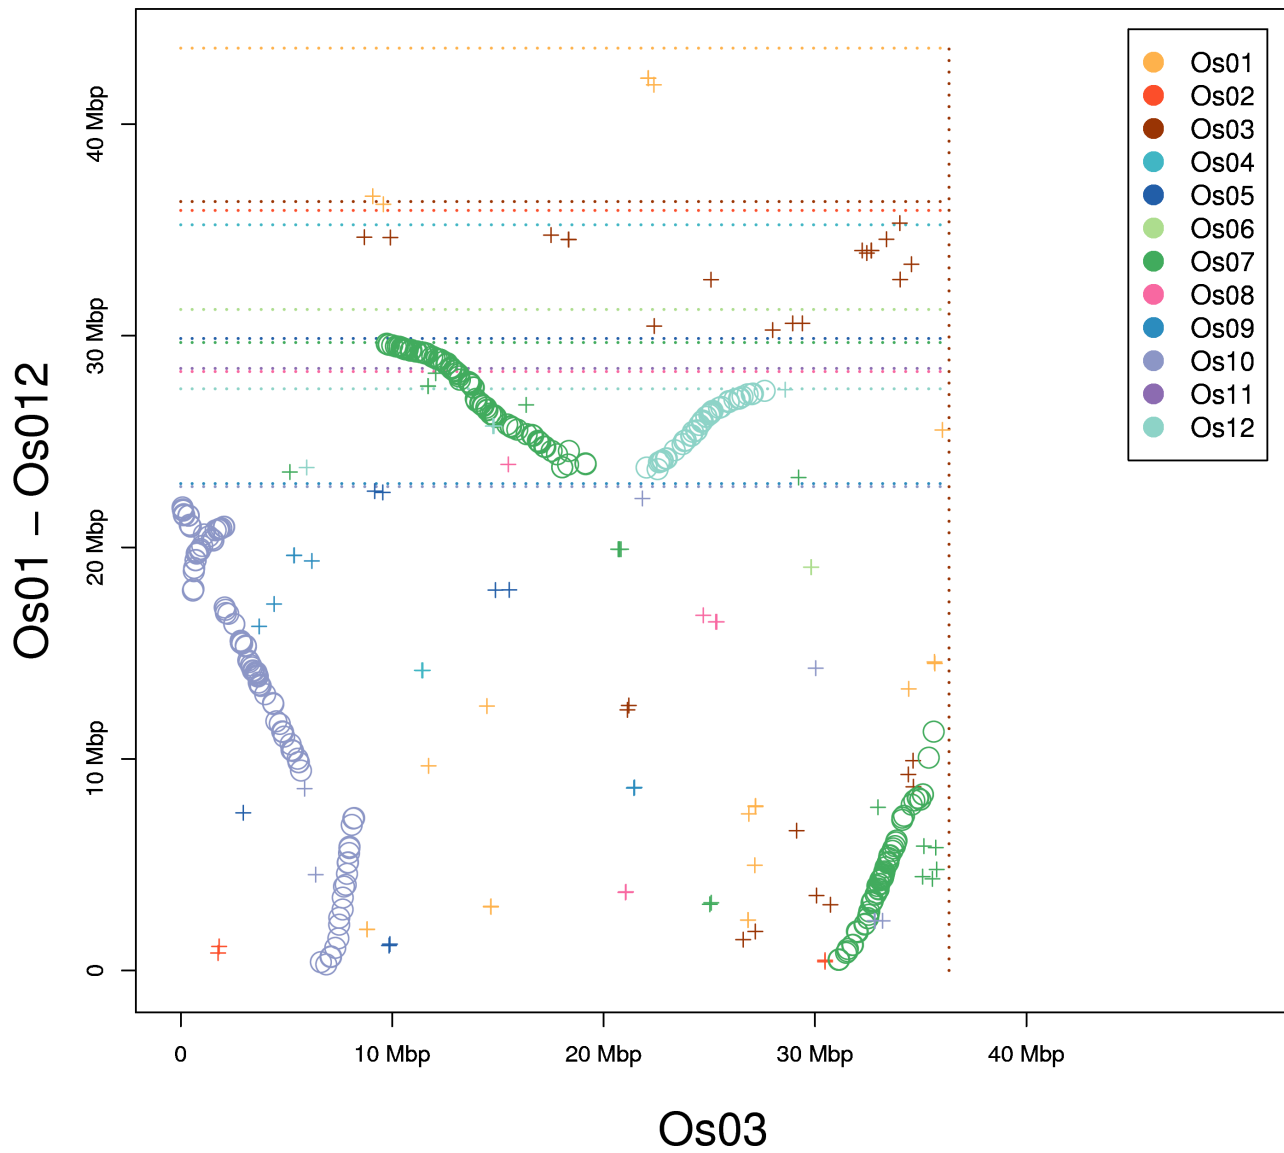

**Figure S2 (continued)**



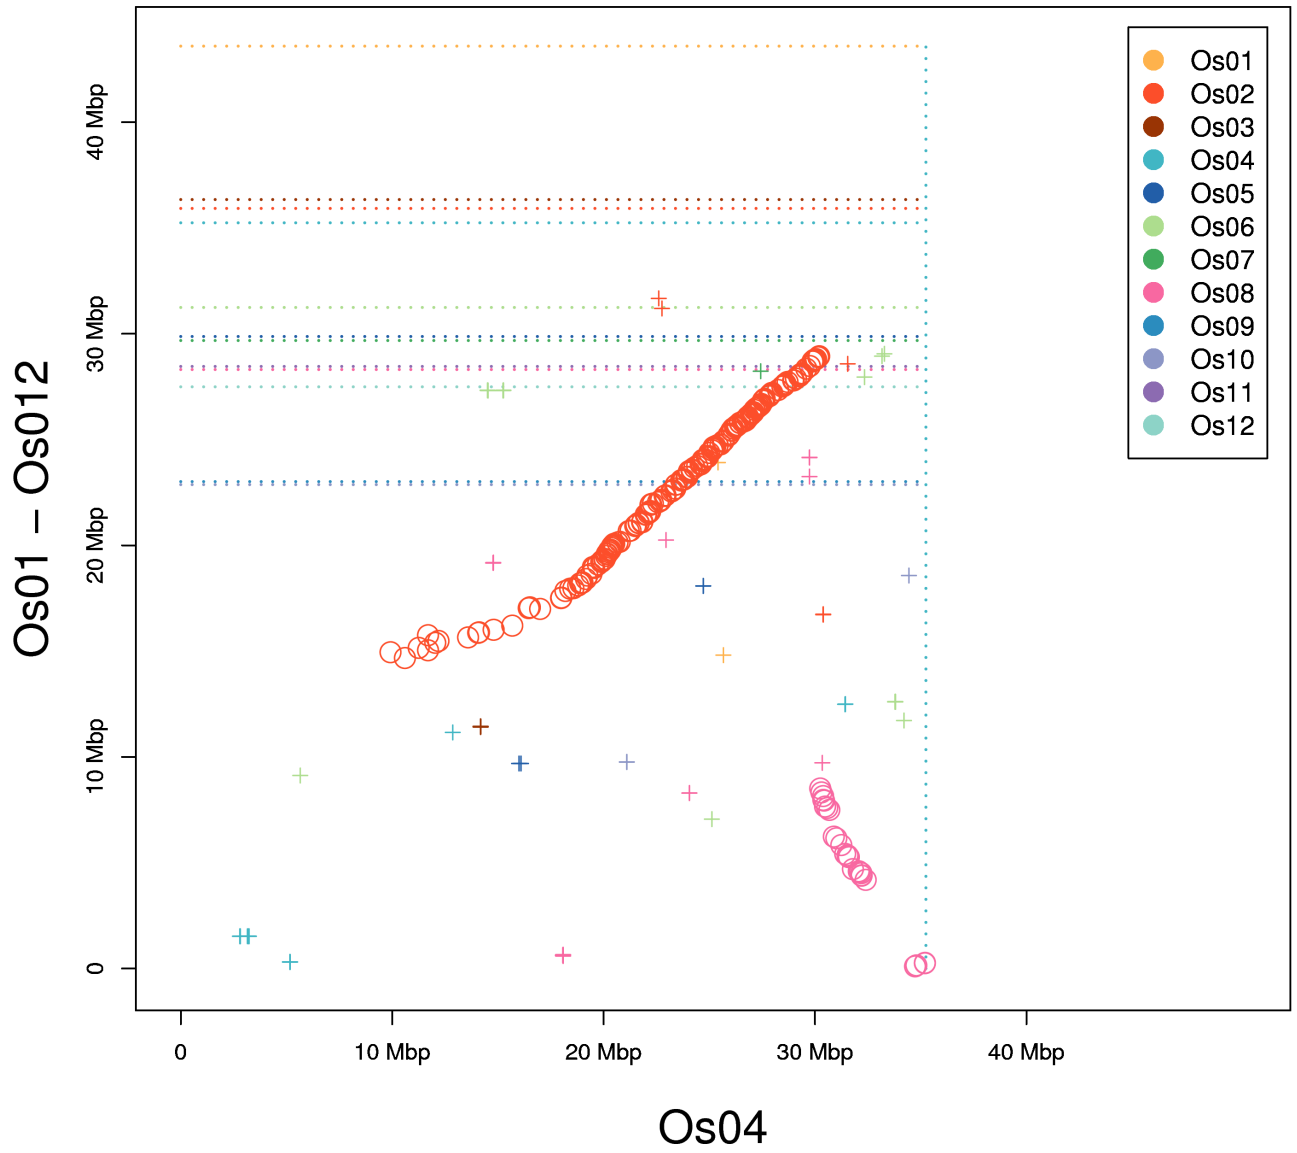

Figure S2 (continued)

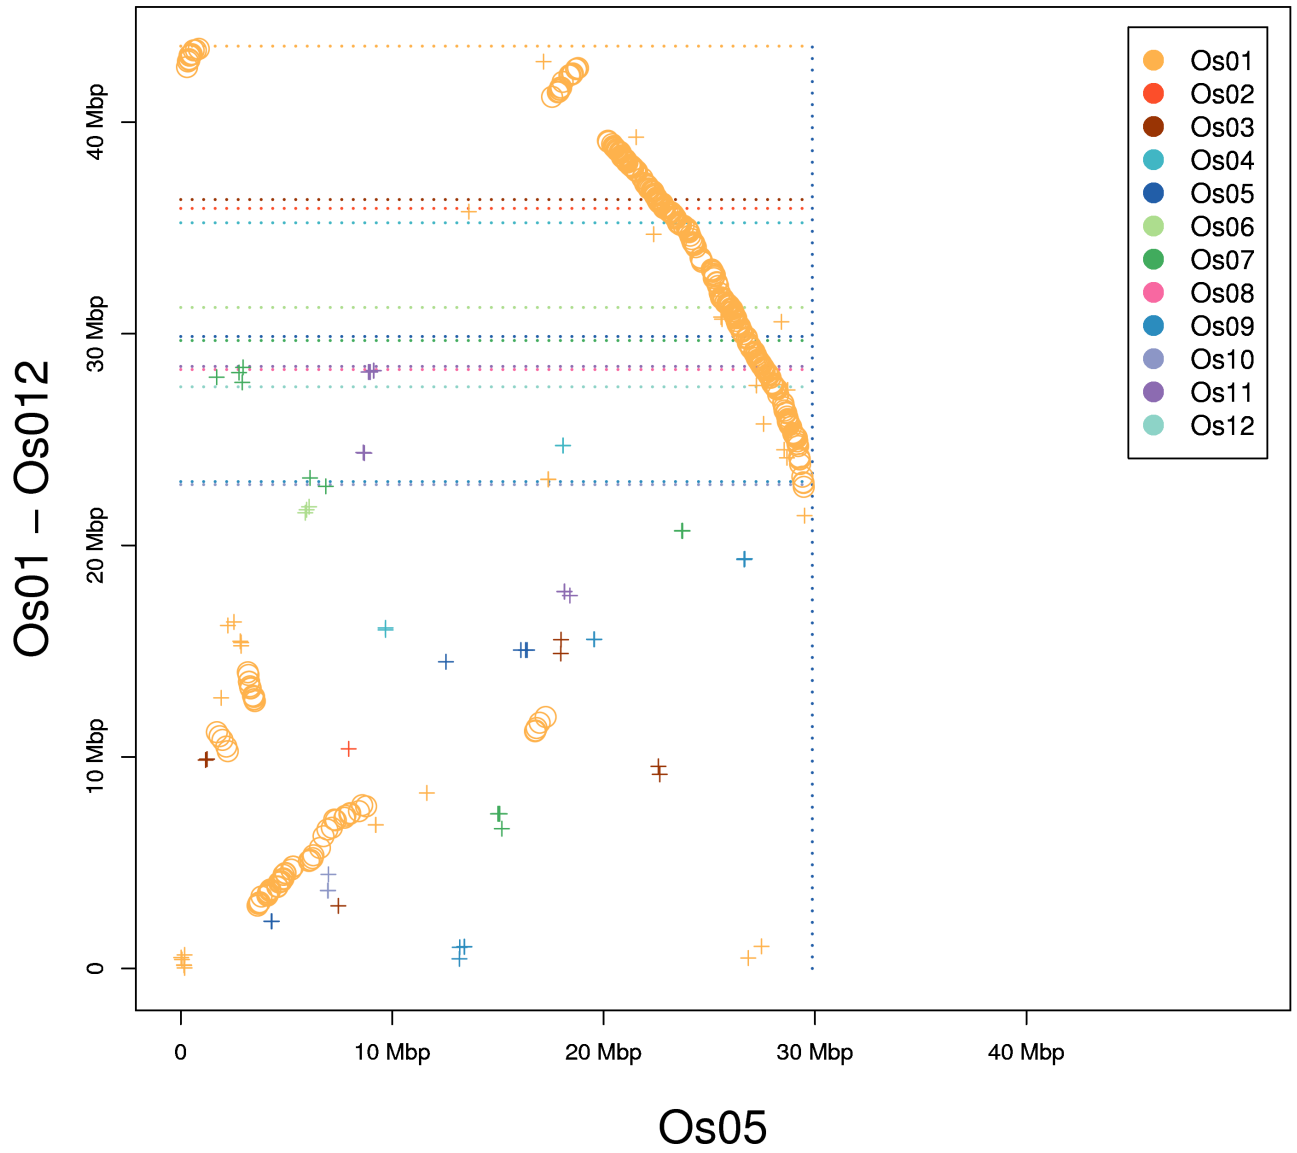

**Figure S2 (continued)**

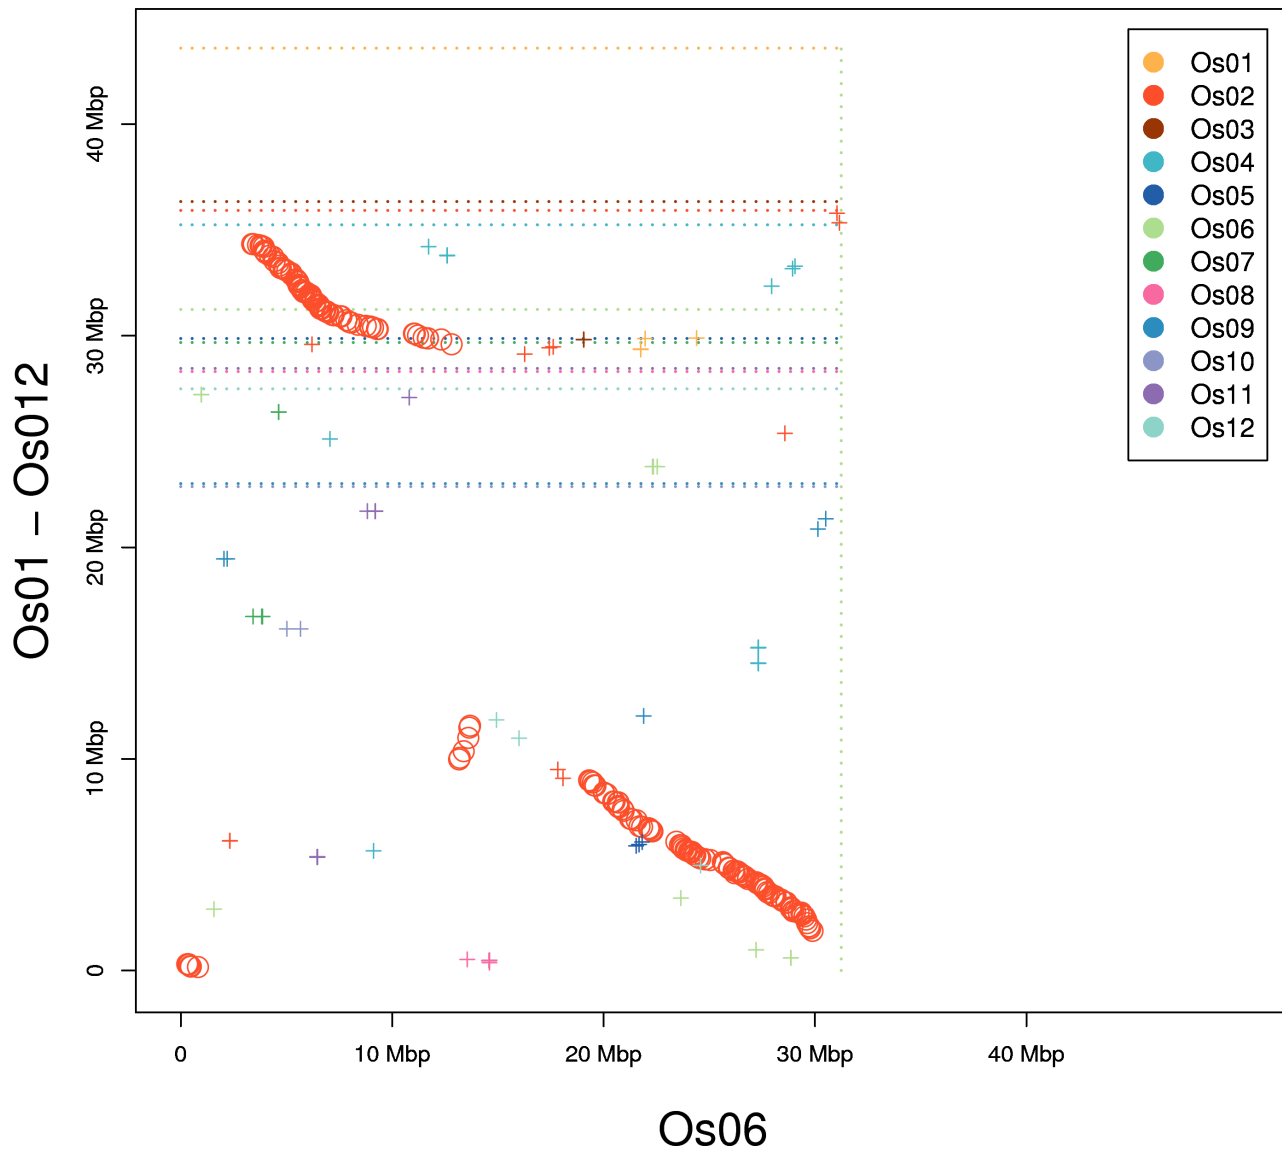

Figure S2 (continued)

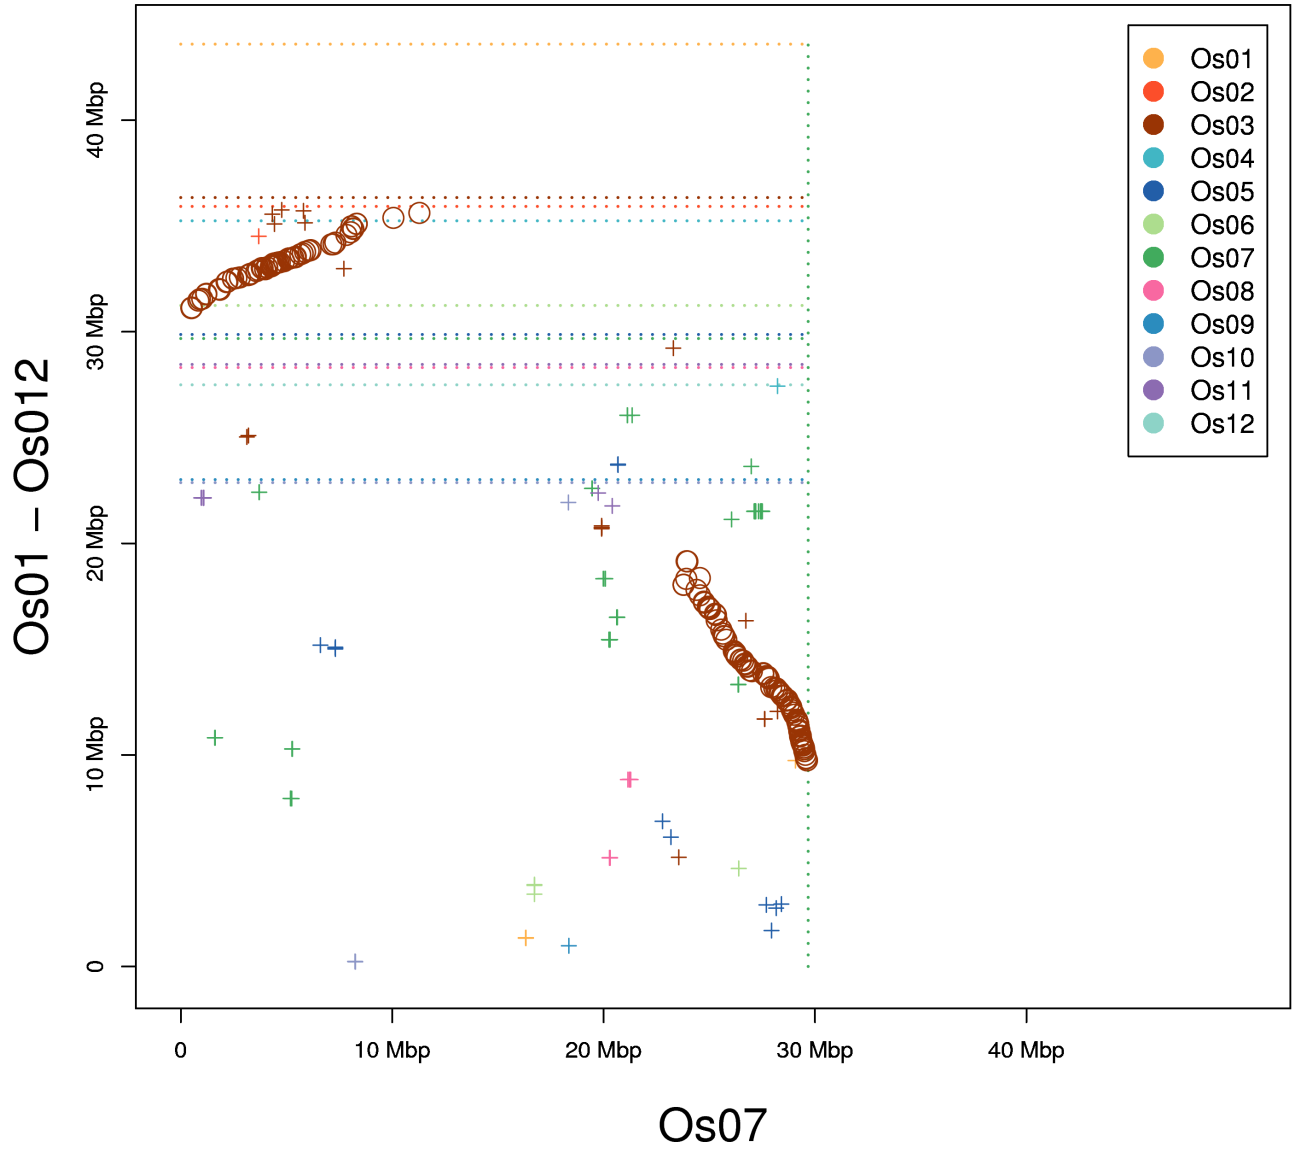

Figure S2 (continued)

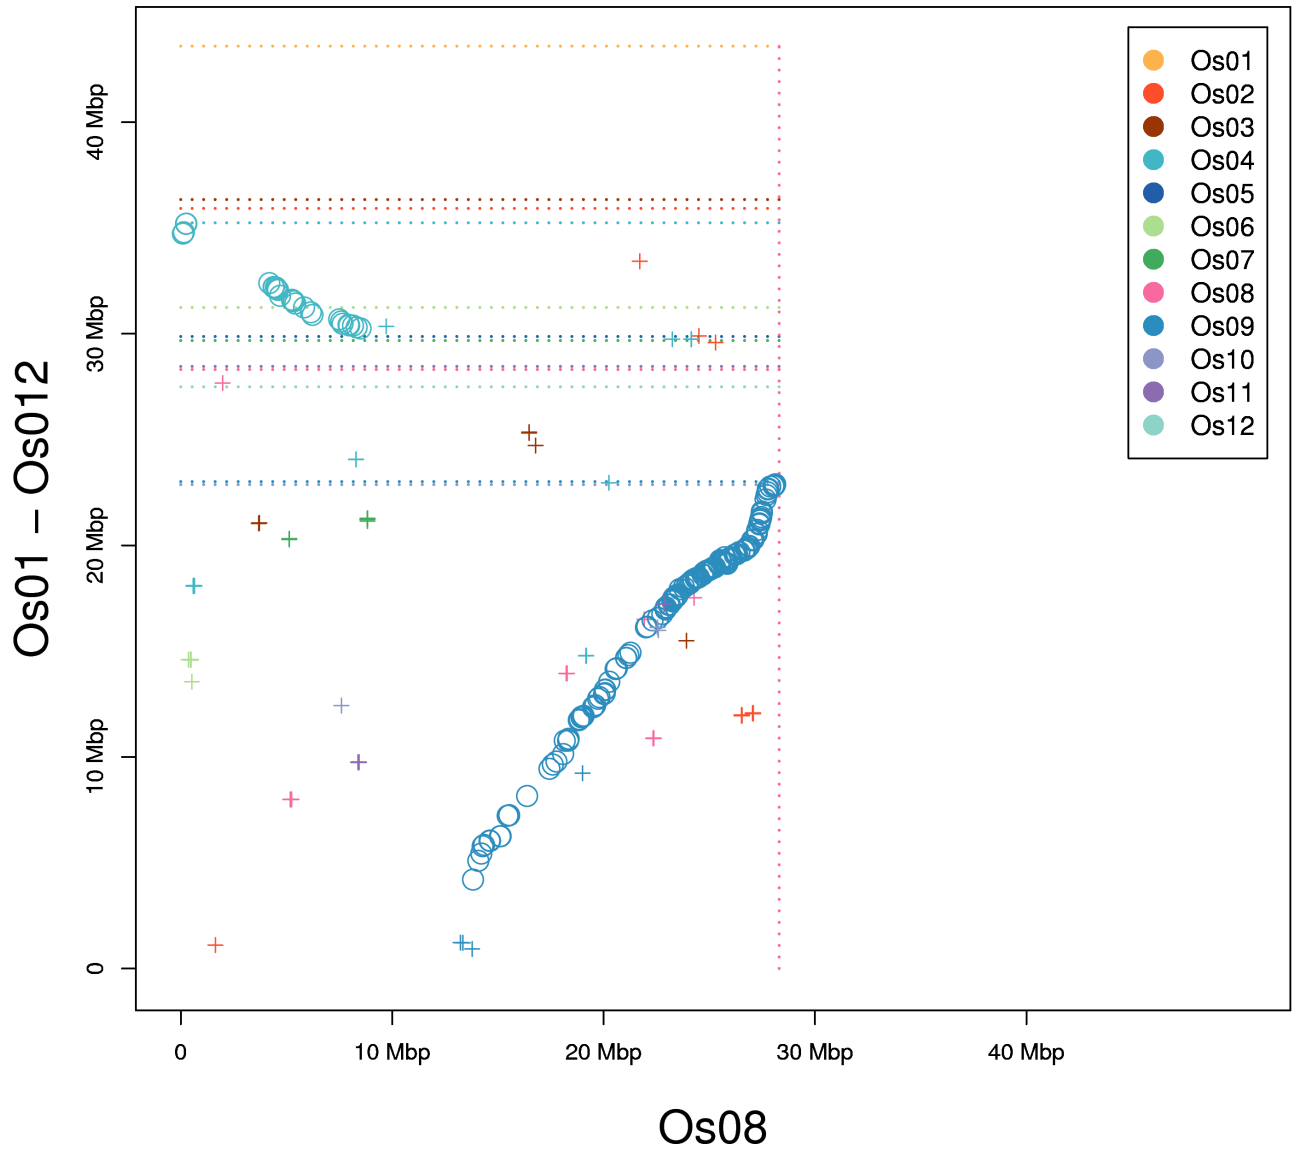

Figure S2 (continued)

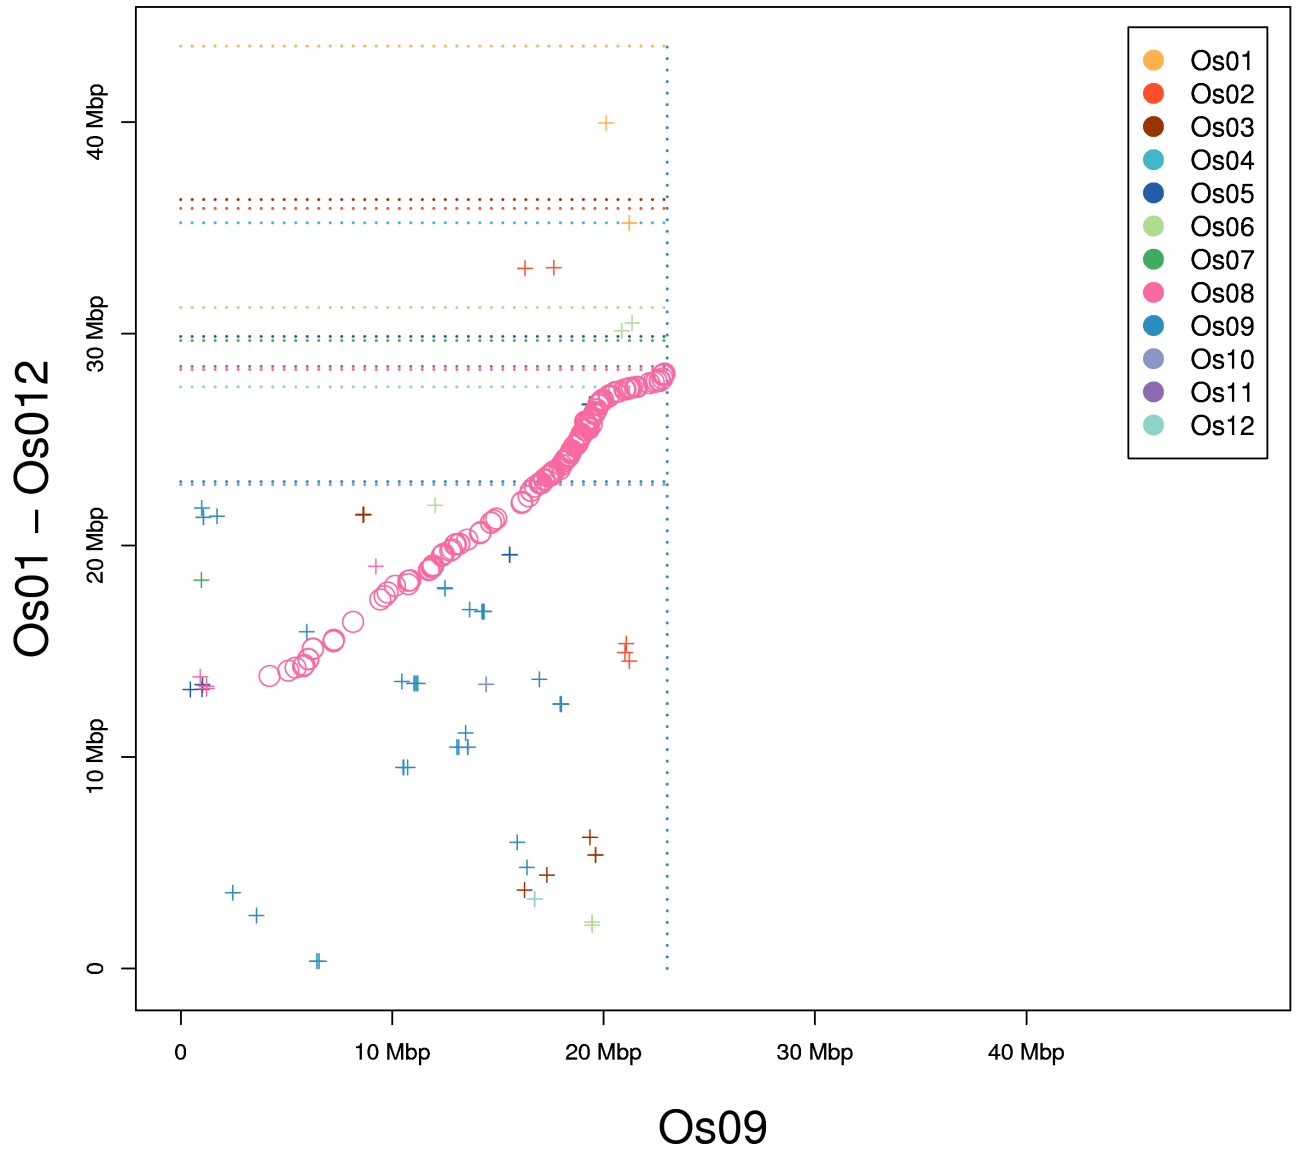

Figure S2 (continued)

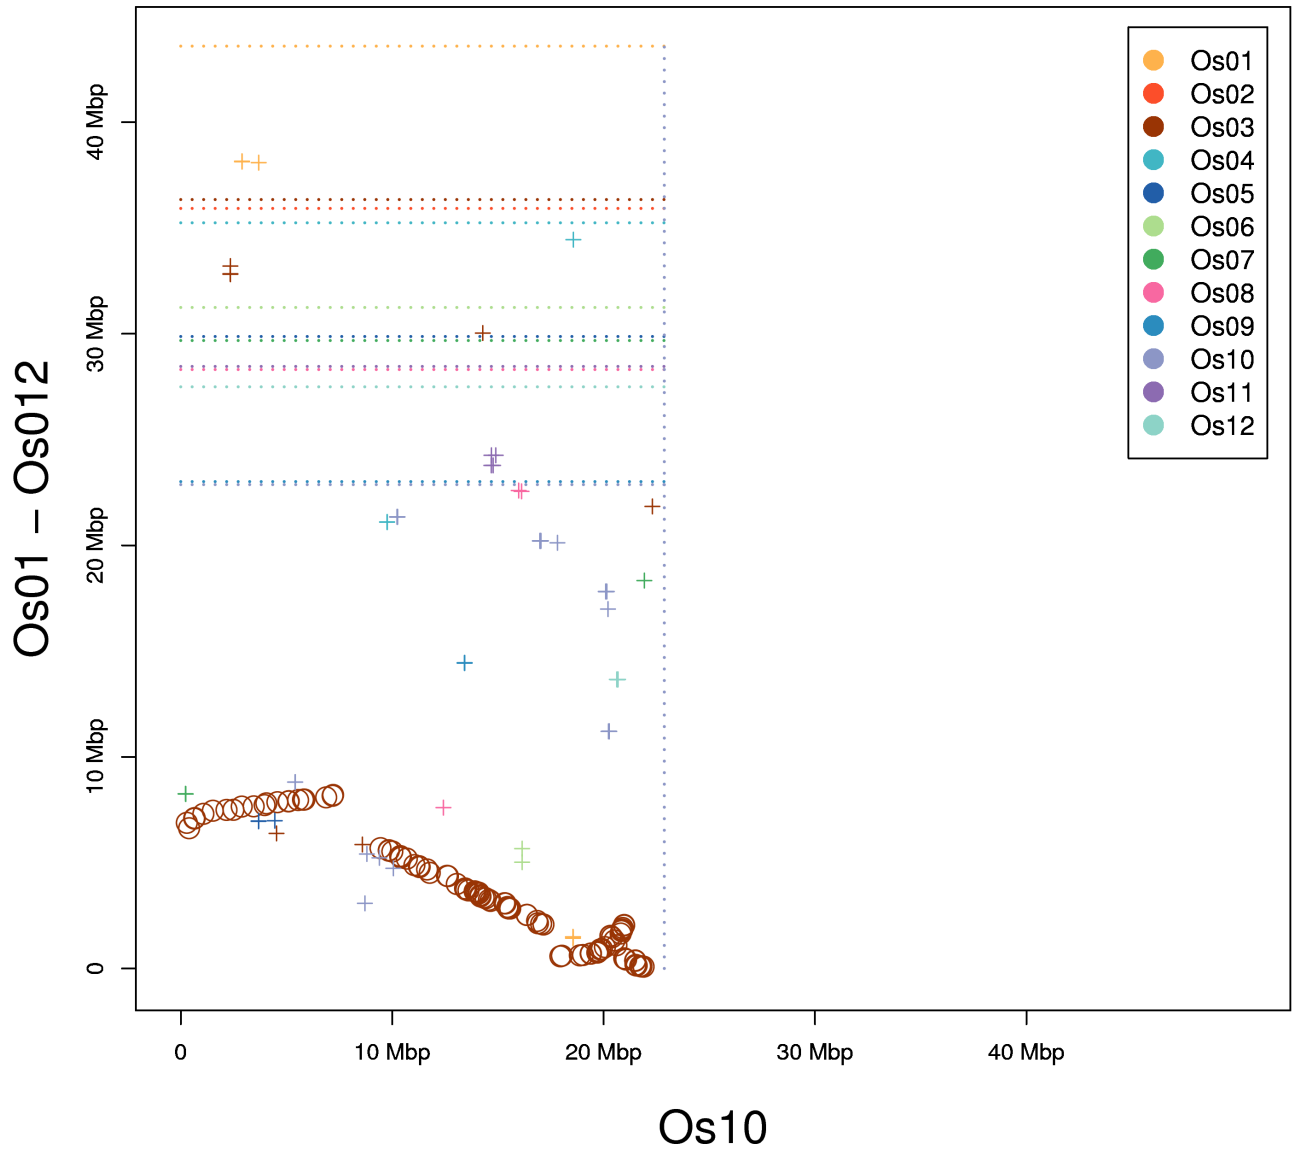

Figure S2 (continued)

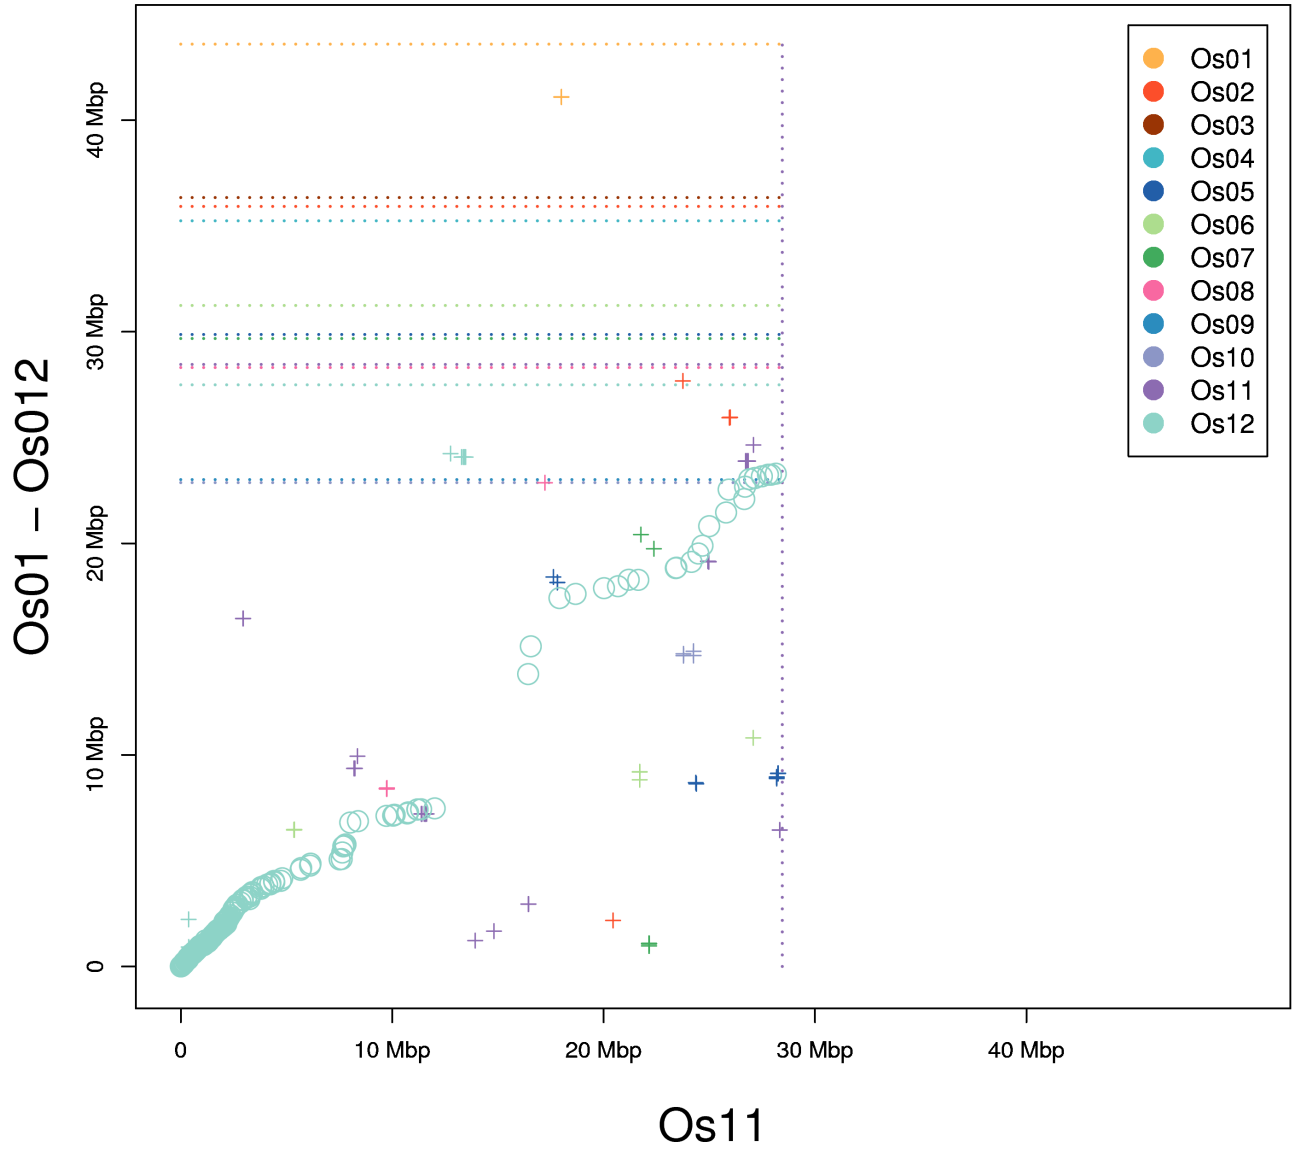

Figure S2 (continued)



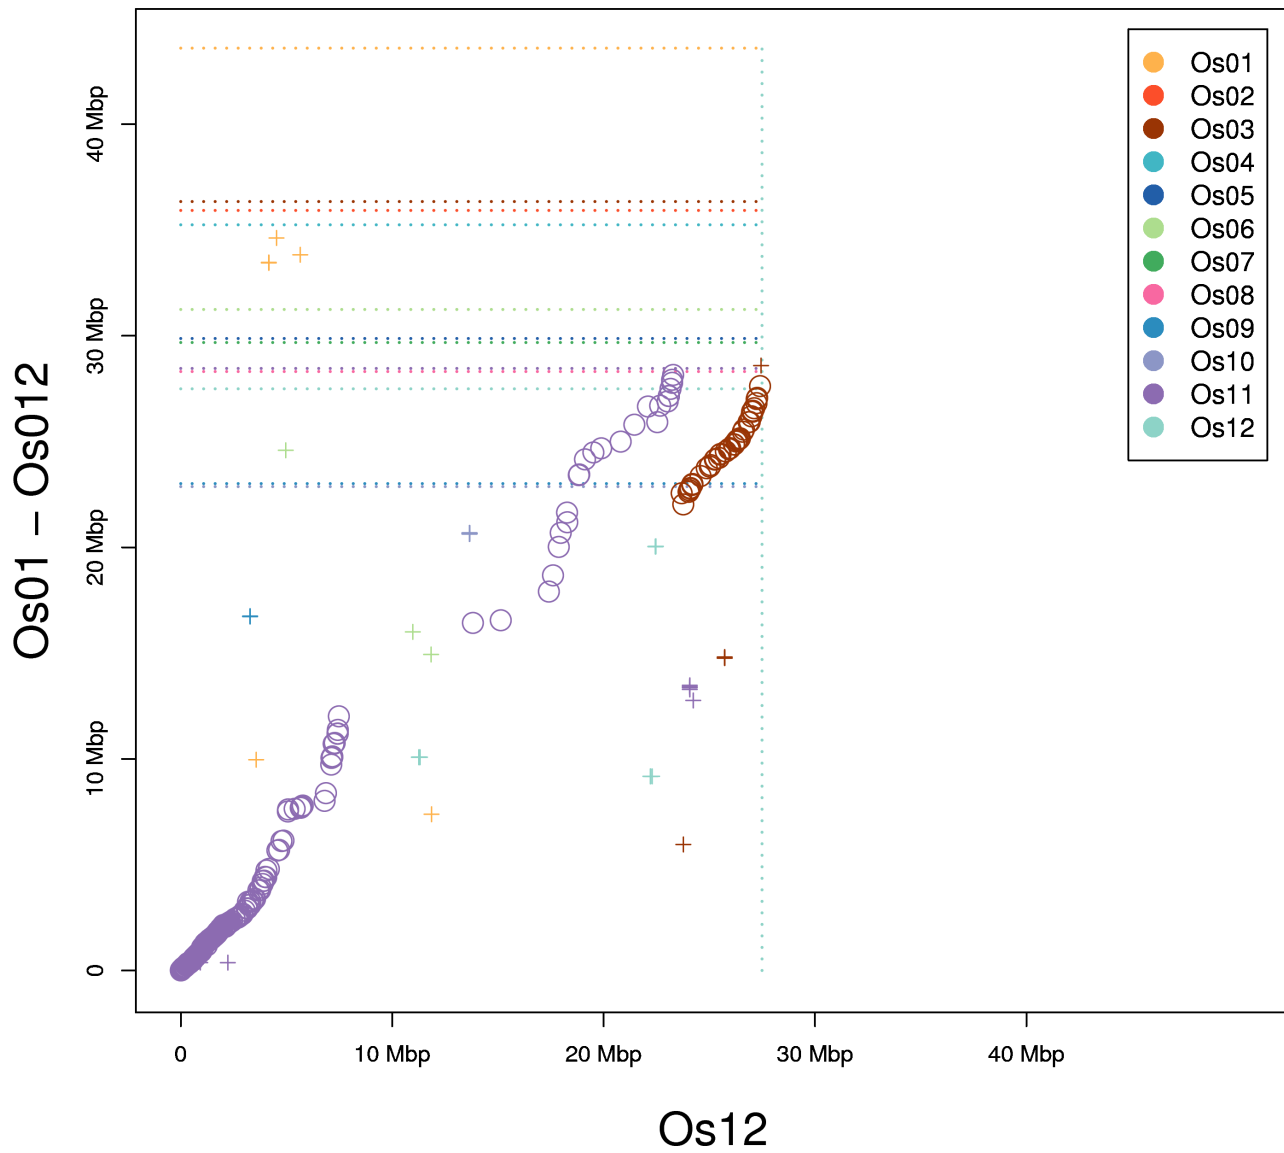

Figure S2 (continued)

**Table S2: Extent of rice segmental duplications and shared synteny with barley.**

|                                          | <b>Os01</b> | <b>Os02</b> | <b>Os03</b> | <b>Os04</b> | <b>Os05</b> | <b>Os06</b> | <b>Os07</b> | <b>Os08</b> | <b>Os09</b> | <b>Os10</b> | <b>Os11</b> | <b>Os12</b> | <b>ALL</b>   |
|------------------------------------------|-------------|-------------|-------------|-------------|-------------|-------------|-------------|-------------|-------------|-------------|-------------|-------------|--------------|
| chromosome size (kb)                     | 43593       | 35925       | 36343       | 35244       | 29872       | 31243       | 29678       | 28307       | 23011       | 22872       | 28456       | 27494       | 372038       |
| segmentally duplicated (kb)              | 25793 (59%) | 28097 (78%) | 26743 (74%) | 22365 (63%) | 17562 (59%) | 21497 (69%) | 17058 (57%) | 18898 (67%) | 18684 (81%) | 18732 (82%) | 24235 (85%) | 21121 (77%) | 260785 (70%) |
| not segmentally duplicated (kb)          | 17800 (41%) | 7828 (22%)  | 9600 (26%)  | 12879 (37%) | 12310 (41%) | 9746 (31%)  | 12620 (43%) | 9409 (33%)  | 4327 (19%)  | 4140 (18%)  | 4221 (15%)  | 6373 (23%)  | 111253 (30%) |
| shared synteny with barley (kb)          | 30521 (70%) | 26023 (72%) | 21432 (59%) | 22594 (64%) | 14923 (50%) | 31061 (99%) | 13137 (44%) | 21546 (76%) | 21611 (94%) | 10123 (44%) | 5161 (18%)  | 17714 (64%) | 235846 (63%) |
| not syntenic to barley (kb)              | 13072 (30%) | 9902 (28%)  | 14911 (41%) | 12650 (36%) | 14949 (50%) | 182 (1%)    | 16541 (56%) | 6761 (24%)  | 1400 (6%)   | 12749 (56%) | 23295 (82%) | 9780 (36%)  | 136192 (37%) |
| nr of syn markers (frequency per kb chr) | 162 (1/269) | 120 (1/299) | 155 (1/234) | 109 (1/323) | 93 (1/321)  | 95 (1/329)  | 72 (1/412)  | 34 (1/833)  | 48 (1/479)  | 30 (1/762)  | 8 (1/3557)  | 42 (1/655)  | 968 (1/384)  |

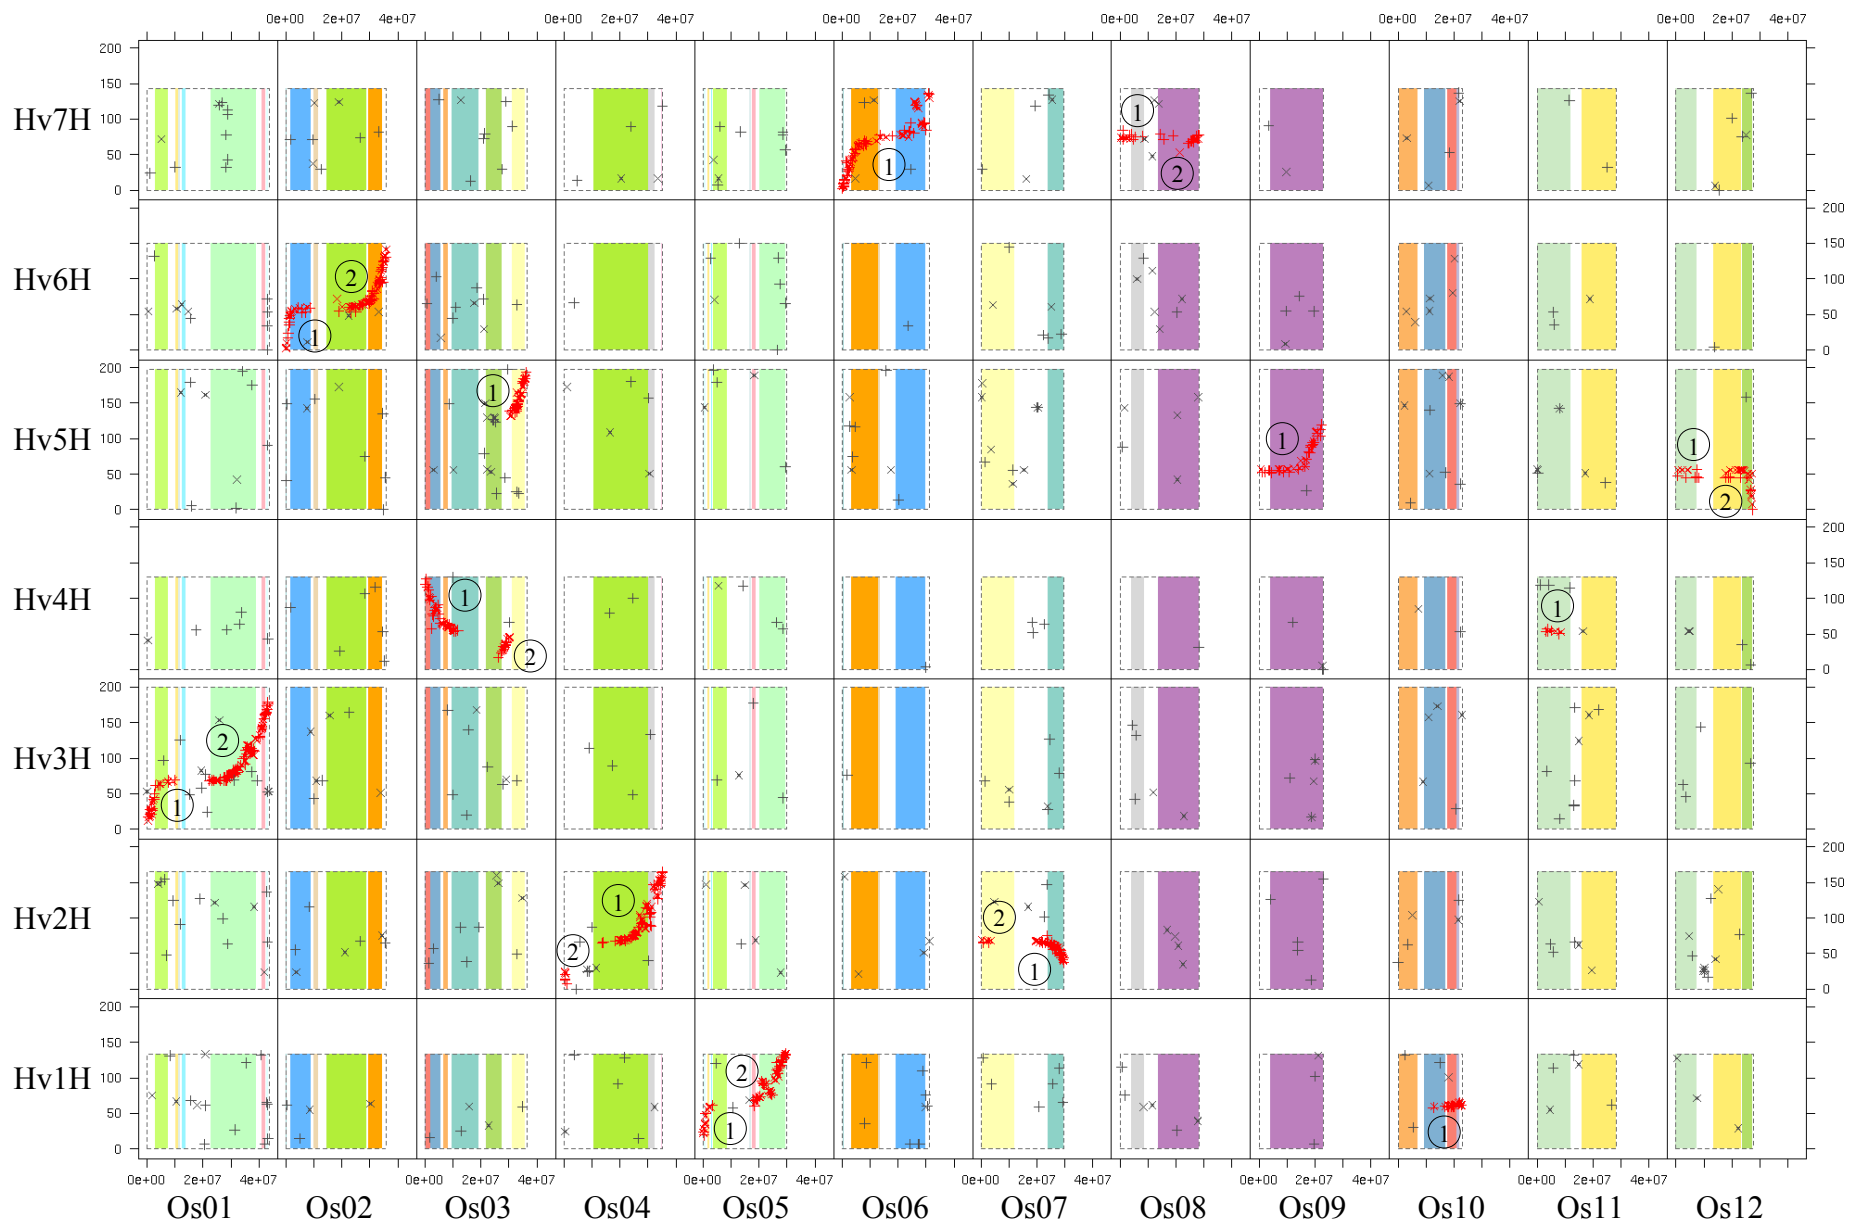

**Figure S3: Shared synteny between barley and rice.** Coordinates of mapped barley ESTs (chromosomes Hv1H – Hv7H) and their best rice homologs (chromosomes Os01 – Os12) are plotted against each other. Orthologs assigned to syntenic segments are shown in red, remaining homologs in grey. Numbers at segments follow the numbering schema of Table S3. Pairs of duplicated segments within the rice genome (Table S1) are indicated by matching colors of underlying filled boxes. Different sources of barley mapping data are indicated (‘+’ for ‘map1’, ‘x’ for ‘map2’, see Methods). Coordinates are in bp and cM for rice and barley, respectively.

**Table S3: Shared synteny between barley and rice.**

| syntenic<br>segment | barley          |       |          |       |          | rice            |       |               |      |               | number          |                           |
|---------------------|-----------------|-------|----------|-------|----------|-----------------|-------|---------------|------|---------------|-----------------|---------------------------|
|                     | chromo-<br>some | start |          | end   |          | chromo-<br>some | start |               | end  |               | of<br>orthologs | significance <sup>1</sup> |
|                     |                 | (cM)  | cDNA     | (cM)  | cDNA     |                 | (Mb)  | TIGR locus ID | (Mb) | TIGR locus ID |                 |                           |
| hv1H_os05_1         | Hv1H            | 19.3  | HZ58F06  | 61.2  | HY07O10  | Os05            | 0.1   | Os05g01240    | 3.3  | Os05g06500    | 17              | < 2.2E-16                 |
| hv1H_os05_2         | Hv1H            | 60.9  | HW02D17  | 133.9 | HY06P08  | Os05            | 17.9  | Os05g31000    | 29.7 | Os05g51830    | 76              | < 2.2E-16                 |
| hv1H_os10_1         | Hv1H            | 58.1  | HY04D20  | 65.3  | 32_8486  | Os10            | 12.6  | Os10g25130    | 22.8 | Os10g42820    | 30              | < 2.2E-16                 |
| hv2H_os04_1         | Hv2H            | 64.7  | HH01F06  | 165.1 | MWG949a  | Os04            | 13.6  | Os04g23830    | 35.2 | Os04g59610    | 99              | < 2.2E-16                 |
| hv2H_os04_2         | Hv2H            | 7.2   | HW08K11  | 25.1  | 32_3627  | Os04            | 0.2   | Os04g01230    | 1.1  | Os04g02900    | 10              | < 2.2E-16                 |
| hv2H_os07_1         | Hv2H            | 37.7  | HE01A24  | 75.2  | MWG2211  | Os07            | 19.6  | Os07g32800    | 29.6 | Os07g49400    | 65              | < 2.2E-16                 |
| hv2H_os07_2         | Hv2H            | 65.1  | HW01M06  | 69.6  | 32_6510  | Os07            | 0.3   | Os07g01490    | 3.5  | Os07g07060    | 7               | 1.5E-08                   |
| hv3H_os01_1         | Hv3H            | 12.2  | 32_1173  | 68.9  | HK05A23  | Os01            | 0.4   | Os01g01790    | 9.9  | Os01g17240    | 36              | < 2.2E-16                 |
| hv3H_os01_2         | Hv3H            | 68.8  | HY03N03  | 178.7 | HW05M08  | Os01            | 22.3  | Os01g39110    | 43.3 | Os01g74250    | 126             | < 2.2E-16                 |
| hv4H_os03_1         | Hv4H            | 53.9  | HV05N05  | 127.3 | HA10C05  | Os03            | 0.1   | Os03g01200    | 11.8 | Os03g20780    | 62              | < 2.2E-16                 |
| hv4H_os03_2         | Hv4H            | 16.6  | HY04F13  | 45.9  | 32_14765 | Os03            | 26.2  | Os03g46390    | 30.3 | Os03g52840    | 28              | < 2.2E-16                 |
| hv4H_os11_1         | Hv4H            | 50.3  | HY02N17  | 57.1  | HW04N08  | Os11            | 3.3   | Os11g06720    | 8.4  | Os11g14980    | 8               | 3.5E-10                   |
| hv5H_os03_1         | Hv5H            | 131.8 | 32_1863  | 193.6 | HY05G12  | Os03            | 30.3  | Os03g53000    | 36.1 | Os03g63950    | 65              | < 2.2E-16                 |
| hv5H_os09_1         | Hv5H            | 51.7  | HY02O02  | 119.8 | HY04C22  | Os09            | 0.7   | Os09g01960    | 22.3 | Os09g38750    | 48              | < 2.2E-16                 |
| hv5H_os12_1         | Hv5H            | 45.2  | HK03K09  | 56.1  | HW04N22  | Os12            | 0.6   | Os12g02094    | 8.0  | Os12g14070    | 10              | 2.3E-11                   |
| hv5H_os12_2         | Hv5H            | 0.0   | HW05F15  | 55.8  | 32_8631  | Os12            | 17.6  | Os12g29580    | 27.4 | Os12g44150    | 32              | < 2.2E-16                 |
| hv6H_os02_1         | Hv6H            | 1.6   | 32_1692  | 60.4  | 32_9863  | Os02            | 0.0   | Os02g01070    | 8.5  | Os02g15220    | 30              | < 2.2E-16                 |
| hv6H_os02_2         | Hv6H            | 53.1  | HY10K15  | 141.4 | 32_3363  | Os02            | 18.2  | Os02g30630    | 35.8 | Os02g58560    | 90              | < 2.2E-16                 |
| hv7H_os06_1         | Hv7H            | 2.7   | HY07N21  | 136.7 | HY03C01  | Os06            | 0.1   | Os06g01210    | 31.2 | Os06g51510    | 95              | < 2.2E-16                 |
| hv7H_os08_1         | Hv7H            | 71.2  | HY02C18  | 84.3  | HY03F15  | Os08            | 0.2   | Os08g01370    | 7.9  | Os08g13350    | 13              | 3.9E-15                   |
| hv7H_os08_2         | Hv7H            | 52.8  | 32_11387 | 78.8  | HW01L11  | Os08            | 14.3  | Os08g23810    | 28.1 | Os08g45010    | 21              | < 2.2E-16                 |

<sup>1</sup> one-sided Fisher test, see Methods for details

**Table S4: Shared ancestral duplications between barley and rice.**

| block | barley          |                    |          |                  | rice     |                 |                    |               | number of homologs <sup>2</sup> |            |                          |                        |                       |                          |                     |
|-------|-----------------|--------------------|----------|------------------|----------|-----------------|--------------------|---------------|---------------------------------|------------|--------------------------|------------------------|-----------------------|--------------------------|---------------------|
|       | chromo-<br>some | start <sup>1</sup> |          | end <sup>1</sup> |          | chromo-<br>some | start <sup>1</sup> |               | end <sup>1</sup>                |            | segmental<br>duplication | orthologous<br>segment | paralogous<br>segment | Fisher's test<br>p-value | syntenic<br>segment |
|       | (cM)            | cDNA               | (cM)     | cDNA             | (Mb)     | TIGR locus ID   | (Mb)               | TIGR locus ID |                                 |            |                          |                        |                       |                          |                     |
| AD_1  | Hv1H            | 72.8               | 32_7299  | 133.1            | 32_4927  | Os05            | 20.4               | Os05g34540    | 29.5                            | Os05g51530 | os01_05_5                | 63 (2)                 | 3 (24)                | 1.1E-16                  | hv1H_os05_2         |
| AD_1  | Hv3H            | 68.8               | HY03L07  | 127.7            | 32_3965  | Os01            | 23.1               | Os01g40310    | 38.9                            | Os01g66330 | os01_05_5                | 92 (3)                 | 1 (28)                | 2.5E-23                  | hv3H_os01_2         |
| AD_2  | Hv6H            | 52.1               | HY05I23  | 60.4             | 32_9863  | Os02            | 2.0                | Os02g04460    | 8.5                             | Os02g15220 | os02_06_2                | 9 (0)                  | 1 (2)                 | 4.5E-02                  | hv6H_os02_1         |
| AD_2  | Hv7H            | 74.9               | 32_3232  | 124.5            | 32_5507  | Os06            | 21.0               | Os06g35970    | 29.5                            | Os06g48750 | os02_06_2                | 32 (3)                 | 6 (12)                | 2.0E-05                  | hv7H_os06_2         |
| AD_3  | Hv2H            | 64.7               | HH01F06  | 119.7            | 32_7576  | Os04            | 13.6               | Os04g23830    | 30.0                            | Os04g50990 | os02_04_1                | 58 (10)                | 7 (25)                | 9.4E-10                  | hv2H_os04_1         |
| AD_3  | Hv6H            | 53.1               | HY10K15  | 71.6             | 32_4064  | Os02            | 18.2               | Os02g30630    | 28.8                            | Os02g47220 | os02_04_1                | 30 (2)                 | 2 (19)                | 3.3E-10                  | hv6H_os02_2         |
| AD_4  | Hv6H            | 65.6               | HI04I03  | 113.3            | HY05G09  | Os02            | 29.7               | Os02g48560    | 34.1                            | Os02g55640 | os02_06_4                | 40 (0)                 | 0 (9)                 | 4.9E-10                  | hv6H_os02_2         |
| AD_4  | Hv7H            | 41.3               | HY03P21  | 69.9             | HY02G19  | Os06            | 3.4                | Os06g07120    | 9.1                             | Os06g15990 | os02_06_4                | 23 (2)                 | 1 (8)                 | 2.1E-05                  | hv7H_os06_1         |
| AD_5  | Hv1H            | 58.1               | HY04D20  | 64.3             | 32_1955  | Os10            | 12.6               | Os10g25130    | 21.6                            | Os10g40810 | os03_10 <sup>3</sup>     | 21 (2)                 | 1 (6)                 | 3.1E-04                  | hv1H_os10_1         |
| AD_5  | Hv4H            | 57.6               | HY05N11  | 127.3            | HA10C05  | Os03            | 0.1                | Os03g01200    | 5.5                             | Os03g10800 | os03_10 <sup>3</sup>     | 30 (1)                 | 3 (7)                 | 3.9E-05                  | hv4H_os03_1         |
| AD_6  | Hv5H            | 51.7               | HY02O02  | 119.8            | HY04C22  | Os09            | 4.4                | Os09g08430    | 22.3                            | Os09g38750 | os08_09_1                | 43 (3)                 | 2 (18)                | 3.3E-11                  | hv5H_os09_1         |
| AD_6  | Hv7H            | 52.8               | 32_11387 | 78.8             | HW01L11  | Os08            | 14.3               | Os08g23810    | 28.1                            | Os08g45010 | os08_09_1                | 21 (0)                 | 1 (13)                | 9.5E-09                  | hv7H_os08_2         |
| AD_7  | Hv2H            | 37.7               | HE01A24  | 66.4             | HY09N16  | Os07            | 24.5               | Os07g40890    | 29.6                            | Os07g49400 | os03_07_1                | 48 (5)                 | 6 (18)                | 1.6E-08                  | hv2H_os07_1         |
| AD_7  | Hv4H            | 53.9               | HV05N05  | 57.1             | HW02O04a | Os03            | 9.8                | Os03g17690    | 11.8                            | Os03g20780 | os03_07_1                | 12 (0)                 | 0 (7)                 | 2.0E-05                  | hv4H_os03_1         |

<sup>1</sup> names and coordinates of the marginal barley and rice orthologs of corresponding segments are given

<sup>2</sup> numbers of 'best' and 'second-best' (in brackets) homologs of barley ESTs are given for both the corresponding orthologous and paralogous segments within the rice genome

<sup>3</sup> three contiguous but inverted rice duplications (os03\_10\_1, os03\_10\_2, os03\_10\_3) were summarized to AD\_5

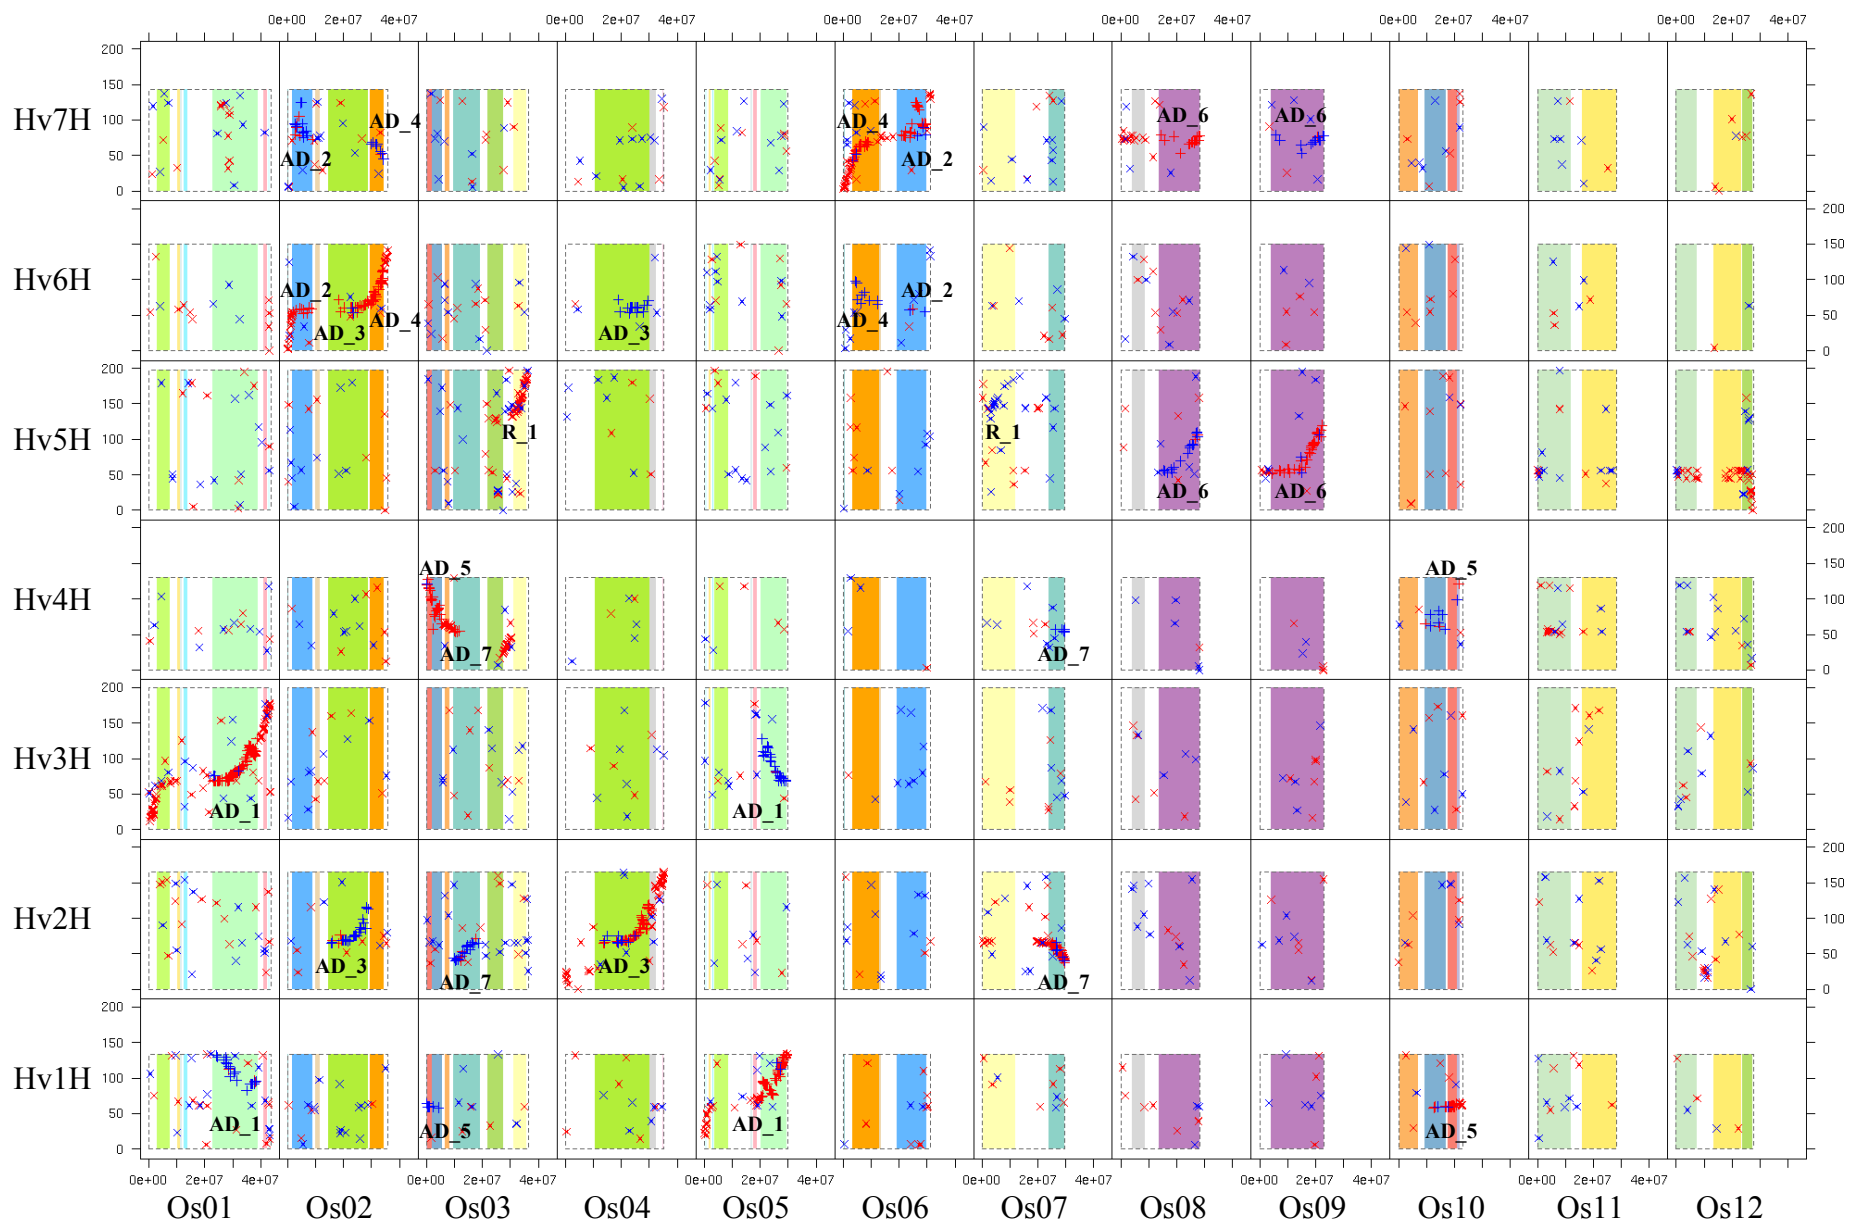

**Figure S4: Shared ancestral duplications between barley and rice.** Coordinates of mapped barley ESTs (Hv1H – Hv7H) are plotted against best (red) and second-best (blue), non-locally duplicated, rice homologs (Os01 – Os12). Membership to ancestral duplicated blocks (AD\_1 – AD\_7) is indicated by ‘+’ symbols (otherwise by ‘x’). Note the accordance of the distribution of best and second-best rice homologs and the location of duplicated rice segments (matching colors of underlying filled boxes, see Table S1). R\_1 corresponds to a barley segment on Hv5H7 with orthology to Os03 and paralogy to Os07. Coordinates are in bp and cM for rice and barley, respectively.

**Table S5: Positive correlation of shared synteny with barley and retention of WGD paralogs in rice.**

| ancestral duplicated block | ortholog pair |                             | rice gene is duplicated | rice gene not duplicated | total | ratio duplicated versus not duplicated | odds ratio  | one-sided Fisher test p-value |
|----------------------------|---------------|-----------------------------|-------------------------|--------------------------|-------|----------------------------------------|-------------|-------------------------------|
| AD_1                       | Hv1H / Os05   | ortholog in barley found    | 24                      | 39                       | 63    | <b>0.62</b>                            | <b>2.19</b> | 3.2E-03                       |
|                            |               | orthology to barley unknown | 330                     | 1177                     | 1507  | <b>0.28</b>                            |             |                               |
|                            |               | total                       | 354                     | 1216                     | 1570  | 0.29                                   |             |                               |
| AD_1                       | Hv3H / Os01   | ortholog in barley found    | 26                      | 66                       | 92    | <b>0.39</b>                            | <b>2.50</b> | 2.5E-04                       |
|                            |               | orthology to barley unknown | 328                     | 2081                     | 2409  | <b>0.16</b>                            |             |                               |
|                            |               | total                       | 354                     | 2147                     | 2501  | 0.16                                   |             |                               |
| AD_3                       | Hv2H / Os04   | ortholog in barley found    | 24                      | 34                       | 58    | <b>0.71</b>                            | <b>6.99</b> | 1.5E-10                       |
|                            |               | orthology to barley unknown | 264                     | 2613                     | 2877  | <b>0.10</b>                            |             |                               |
|                            |               | total                       | 288                     | 2647                     | 2935  | 0.11                                   |             |                               |
| AD_3                       | Hv6H / Os02   | ortholog in barley found    | 15                      | 15                       | 30    | <b>1.00</b>                            | <b>6.57</b> | 1.8E-06                       |
|                            |               | orthology to barley unknown | 273                     | 1794                     | 2067  | <b>0.15</b>                            |             |                               |
|                            |               | total                       | 288                     | 1809                     | 2097  | 0.16                                   |             |                               |
| AD_6                       | Hv5H / Os09   | ortholog in barley found    | 16                      | 27                       | 43    | <b>0.59</b>                            | <b>7.15</b> | 7.5E-08                       |
|                            |               | orthology to barley unknown | 212                     | 2559                     | 2771  | <b>0.08</b>                            |             |                               |
|                            |               | total                       | 228                     | 2586                     | 2814  | 0.09                                   |             |                               |
| AD_6                       | Hv7H / Os08   | ortholog in barley found    | 10                      | 11                       | 21    | <b>0.91</b>                            | <b>7.84</b> | 2.1E-05                       |
|                            |               | orthology to barley unknown | 218                     | 1881                     | 2099  | <b>0.12</b>                            |             |                               |
|                            |               | total                       | 228                     | 1892                     | 2120  | 0.12                                   |             |                               |

**Table S6: Comparison of location and extent of rice segmental duplications to previous studies [11, 12, 19].**

|                                                         | Os01               | Os02               | Os03               | Os04               | Os05               | Os06               | Os07               | Os08               | Os09               | Os10               | Os11               | Os12               | ALL                 |
|---------------------------------------------------------|--------------------|--------------------|--------------------|--------------------|--------------------|--------------------|--------------------|--------------------|--------------------|--------------------|--------------------|--------------------|---------------------|
| chromosome size (kb)                                    | 43593              | 35925              | 36343              | 35244              | 29872              | 31243              | 29678              | 28307              | 23011              | 22872              | 28456              | 27494              | 372038              |
| <b>total duplicated segment size (kb)</b>               | <b>25793 (59%)</b> | <b>28097 (78%)</b> | <b>26743 (74%)</b> | <b>22365 (63%)</b> | <b>17562 (59%)</b> | <b>21497 (69%)</b> | <b>17058 (57%)</b> | <b>18898 (67%)</b> | <b>18684 (81%)</b> | <b>18732 (82%)</b> | <b>24235 (85%)</b> | <b>21121 (77%)</b> | <b>260785 (70%)</b> |
| Yu <i>et al.</i> [11] total (relative to this study)    | 31000 (120%)       | 28800 (103%)       | 23500 (88%)        | 23200 (104%)       | 19800 (113%)       | 25300 (118%)       | 13900 (81%)        | 17200 (91%)        | 16300 (87%)        | 19700 (105%)       | 13900 (57%)        | 13300 (63%)        | 245900 (94%)        |
| overlap with this study                                 | 20800 (81%)        | 25204 (90%)        | 13959 (52%)        | 20685 (92%)        | 13045 (74%)        | 20160 (94%)        | 12574 (74%)        | 14706 (78%)        | 15999 (86%)        | 16937 (90%)        | 13273 (55%)        | 13300 (63%)        | 200642 (77%)        |
| no overlap, only identified in this study               | 4993 (19%)         | 2893 (10%)         | 12784 (48%)        | 1680 (8%)          | 4517 (26%)         | 1337 (6%)          | 4484 (26%)         | 4192 (22%)         | 2685 (14%)         | 1795 (10%)         | 10962 (45%)        | 7821 (37%)         | 60143 (23%)         |
| no overlap, only identified by Yu <i>et al.</i> [11]    | 10200 (33%)        | 3596 (12%)         | 9541 (41%)         | 2515 (11%)         | 6755 (34%)         | 5140 (20%)         | 1326 (10%)         | 2494 (15%)         | 301 (2%)           | 2763 (14%)         | 627 (5%)           | 0 (0%)             | 45258 (18%)         |
| Wang <i>et al.</i> [12] total (relative to this study)  | 20880 (81%)        | 26860 (96%)        | 16110 (60%)        | 14920 (67%)        | 14170 (81%)        | 20750 (97%)        | 13810 (81%)        | 10370 (55%)        | 11560 (62%)        | 6310 (34%)         | 5440 (22%)         | 4270 (20%)         | 165450 (63%)        |
| Salse <i>et al.</i> [19] total (relative to this study) | 28160 (109%)       | 31910 (114%)       | 31340 (117%)       | 14580 (65%)        | 20060 (114%)       | 26170 (122%)       | 21960 (129%)       | 23910 (127%)       | 20180 (108%)       | 12070 (64%)        | 23140 (95%)        | 18230 (86%)        | 271710 (104%)       |
| overlap with this study                                 | 20596 (80%)        | 27204 (97%)        | 25805 (96%)        | 12866 (58%)        | 12920 (74%)        | 20378 (95%)        | 15353 (90%)        | 15953 (84%)        | 18009 (96%)        | 11547 (62%)        | 19119 (79%)        | 12425 (59%)        | 212175 (81%)        |
| no overlap, only identified in this study               | 5197 (20%)         | 893 (3%)           | 938 (4%)           | 9499 (42%)         | 4642 (26%)         | 1119 (5%)          | 1705 (10%)         | 2945 (16%)         | 675 (4%)           | 7185 (38%)         | 5116 (21%)         | 8696 (41%)         | 48610 (19%)         |
| no overlap, only identified by Salse <i>et al.</i> [19] | 7564 (24%)         | 4706 (16%)         | 5535 (24%)         | 1714 (7%)          | 7140 (36%)         | 5792 (23%)         | 6607 (48%)         | 7957 (46%)         | 2171 (13%)         | 523 (3%)           | 4021 (29%)         | 5805 (44%)         | 59535 (24%)         |
| Salse <i>et al.</i> [19] incl superimposed segments     | 40010              | 64780              | 43360              | 18610              | 47570              | 46940              | 38490              | 37420              | 37610              | 18250              | 34460              | 33080              |                     |
| Salse <i>et al.</i> [19], 2 times superimposed          | 6250 (22%)         | 11312 (35%)        | 12020 (38%)        | 4030 (28%)         | 2380 (12%)         | 13310 (51%)        | 14470 (66%)        | 12750 (53%)        | 14750 (73%)        | 6180 (51%)         | 11120 (48%)        | 8470 (46%)         | 117042 (43%)        |
| Salse <i>et al.</i> [19], 3 times superimposed          | 2800 (10%)         | 5649 (18%)         | 0 (0%)             | 0 (0%)             | 5410 (27%)         | 3730 (14%)         | 1030 (5%)          | 380 (2%)           | 1340 (7%)          | 0 (0%)             | 100 (0%)           | 3190 (17%)         | 23629 (9%)          |
| Salse <i>et al.</i> [19], 4 times superimposed          | 0 (0%)             | 3420 (11%)         | 0 (0%)             | 0 (0%)             | 4770 (24%)         | 0 (0%)             | 0 (0%)             | 0 (0%)             | 0 (0%)             | 0 (0%)             | 0 (0%)             | 0 (0%)             | 8190 (3%)           |



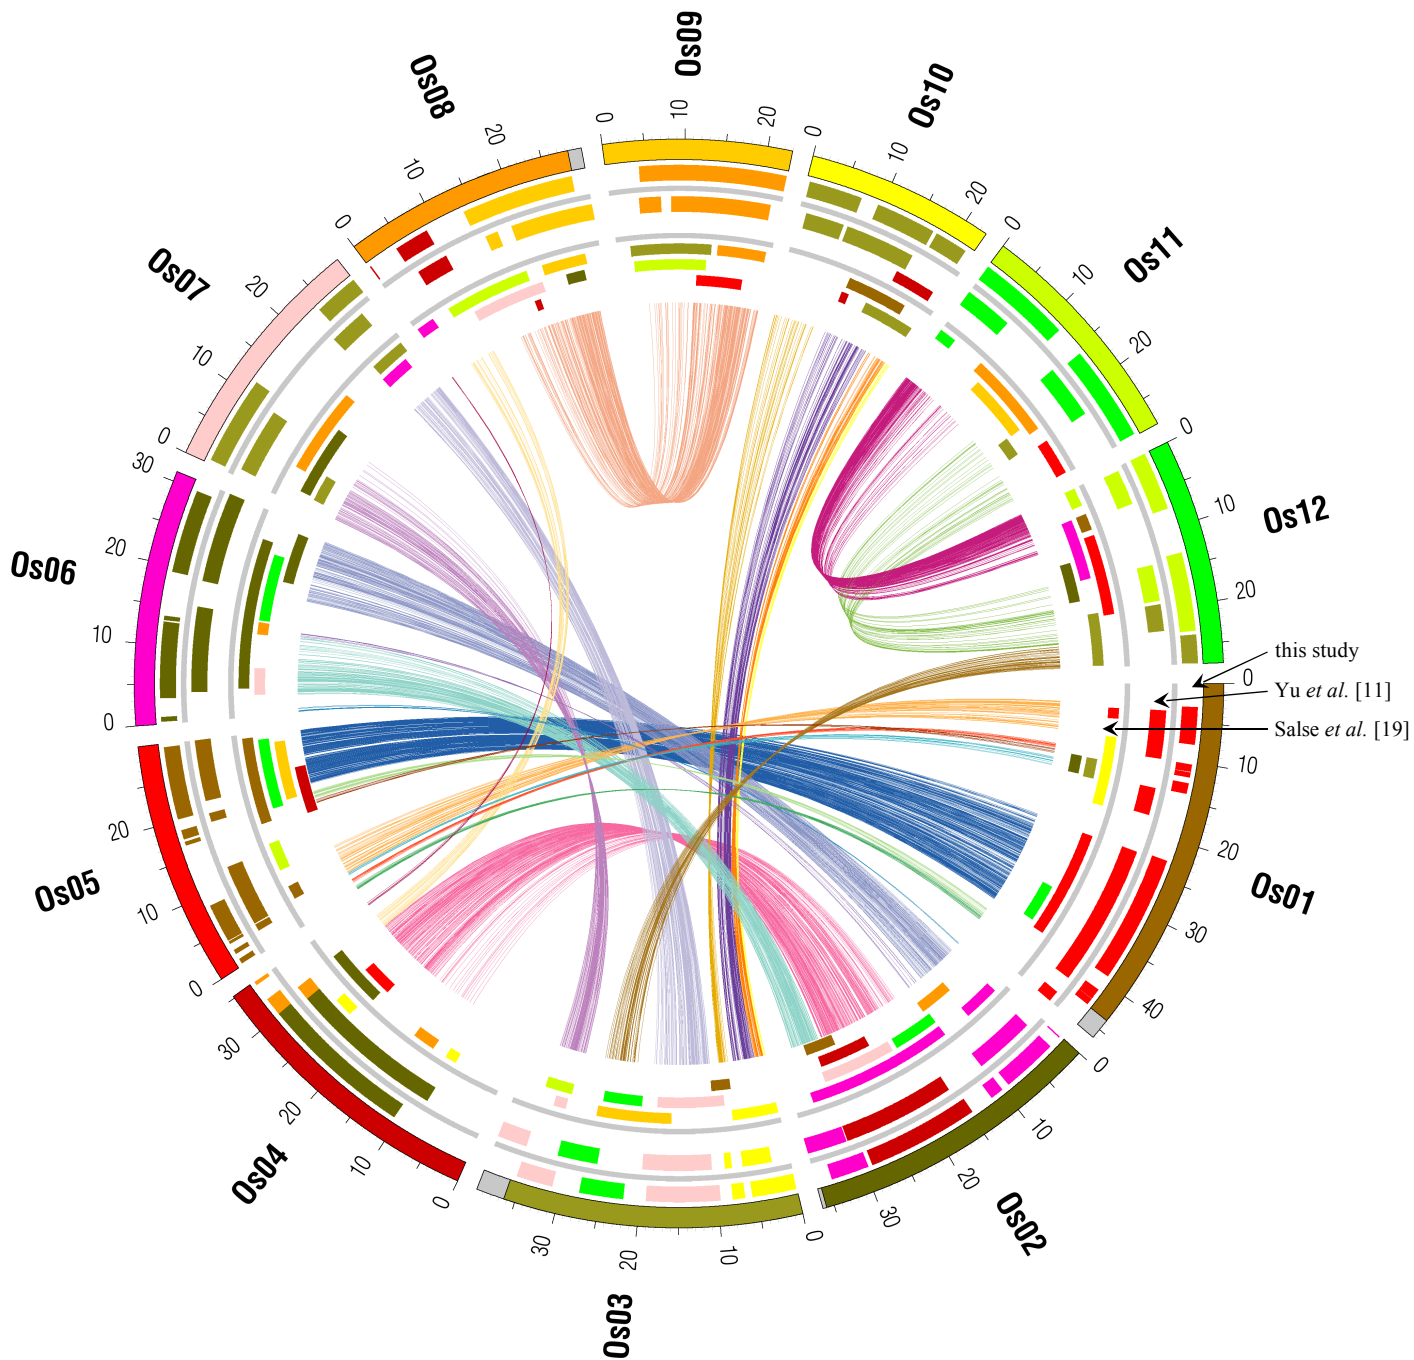

**Figure S5: Comparison of location and extent of segmental duplications within the rice genome to two previous studies [11, 19].** Segmentally duplicated rice genes identified in this study are displayed by connecting lines among the 12 rice chromosomes (Os01 – Os12) and could be organized in 24 pairs of duplicated genome segments (see Figure 1). Bar colors indicate on which chromosome the corresponding duplicated segment is located, from the outer to the inner lane (separated by grey lines) as follows: (1) this study, (2) Yu *et al.* [11], (3) Salse *et al.* [19]. Note the shifted location of corresponding segments compared to Yu *et al.* [11] using the rice *indica* assembly.

**Table S7: Mean prediction errors of regression methods used for barley map integration.**

| <b>chromosome<br/>(nr of anchors)</b> | <b>Linear regression</b> | <b>Local polynomial regression</b> | <b>Local polynomial regression (robust)</b> |
|---------------------------------------|--------------------------|------------------------------------|---------------------------------------------|
| 1H (13)                               | 2.5                      | 1.1*                               | 1.4                                         |
| 2H (29)                               | 4.6                      | 3.4                                | 2.1*                                        |
| 3H (14)                               | 2.3                      | 1.1                                | 1.0*                                        |
| 4H (13)                               | 4.2                      | 4.1                                | 2.3*                                        |
| 5H (21)                               | 4.5                      | 3.6                                | 3.5*                                        |
| 6H (22)                               | 4.0                      | 3.9                                | 2.3*                                        |
| 7H (19)                               | 4.9                      | 4.6                                | 2.8*                                        |

Mean values of prediction errors (in cM) were computed chromosome-wise for all n common EST markers between both data sets ('map1' and 'map2', see Methods) using the n-1 smallest absolute differences of the real versus the predicted mapping position thus allowing one outlier per chromosome. Asterisks show the lowest prediction error among all three regression methods per chromosome. Numbers in brackets show the number of anchor markers between both maps.

## Hv1H

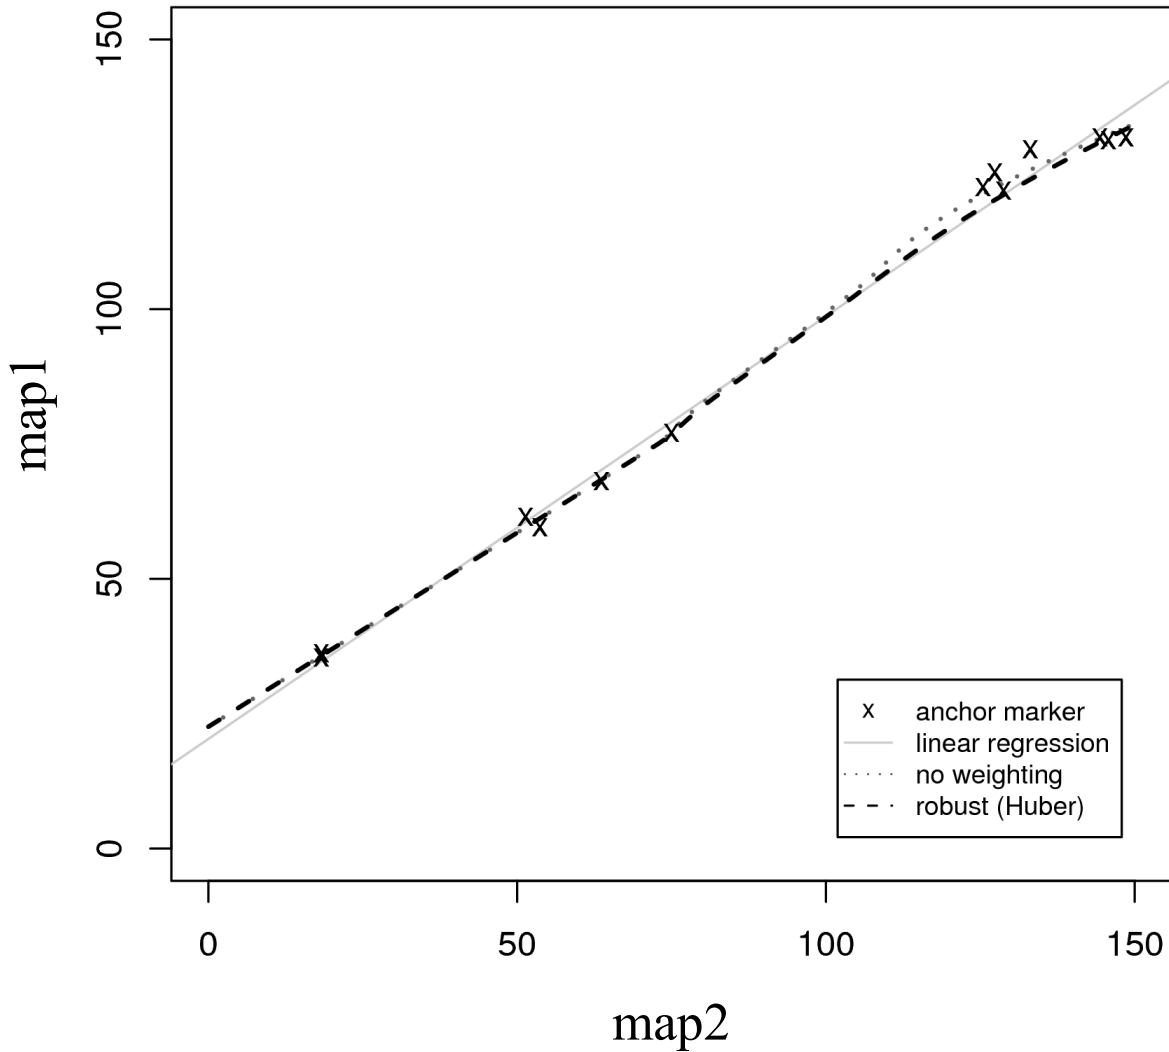

**Figure S6: Regression plots for the integration of two barley genetic maps.** Coordinates of common markers (chromosomes Hv1H – Hv7H) of both genetic maps (‘map1’ and ‘map2’, see Methods) were plotted against each other and used as anchor points for map integration using three regression methods (linear regression, local polynomial regression – no weighting, local polynomial regression – robust, see Methods).

# Hv2H

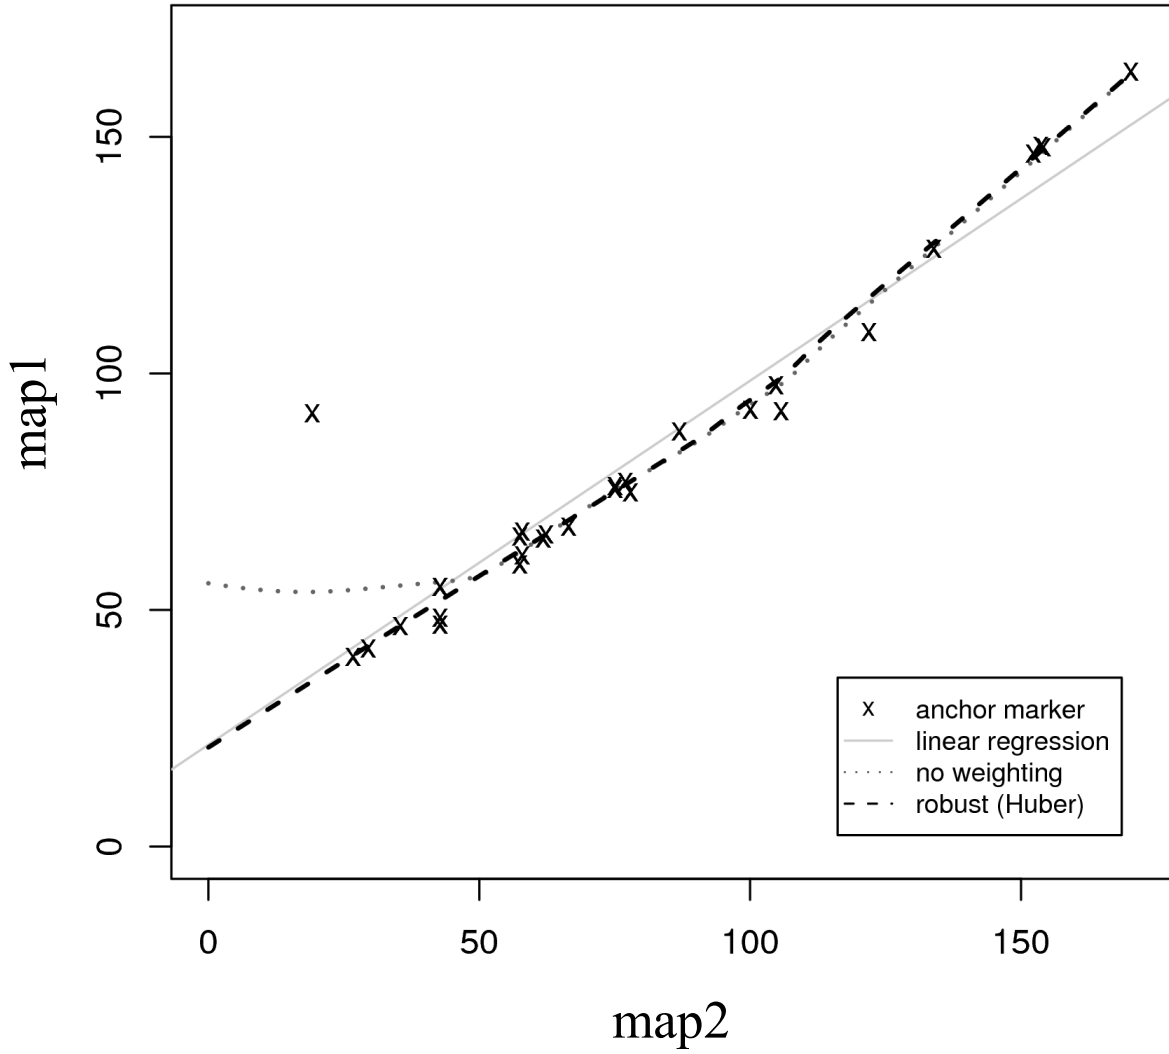

Figure S6 (continued)

# Hv3H

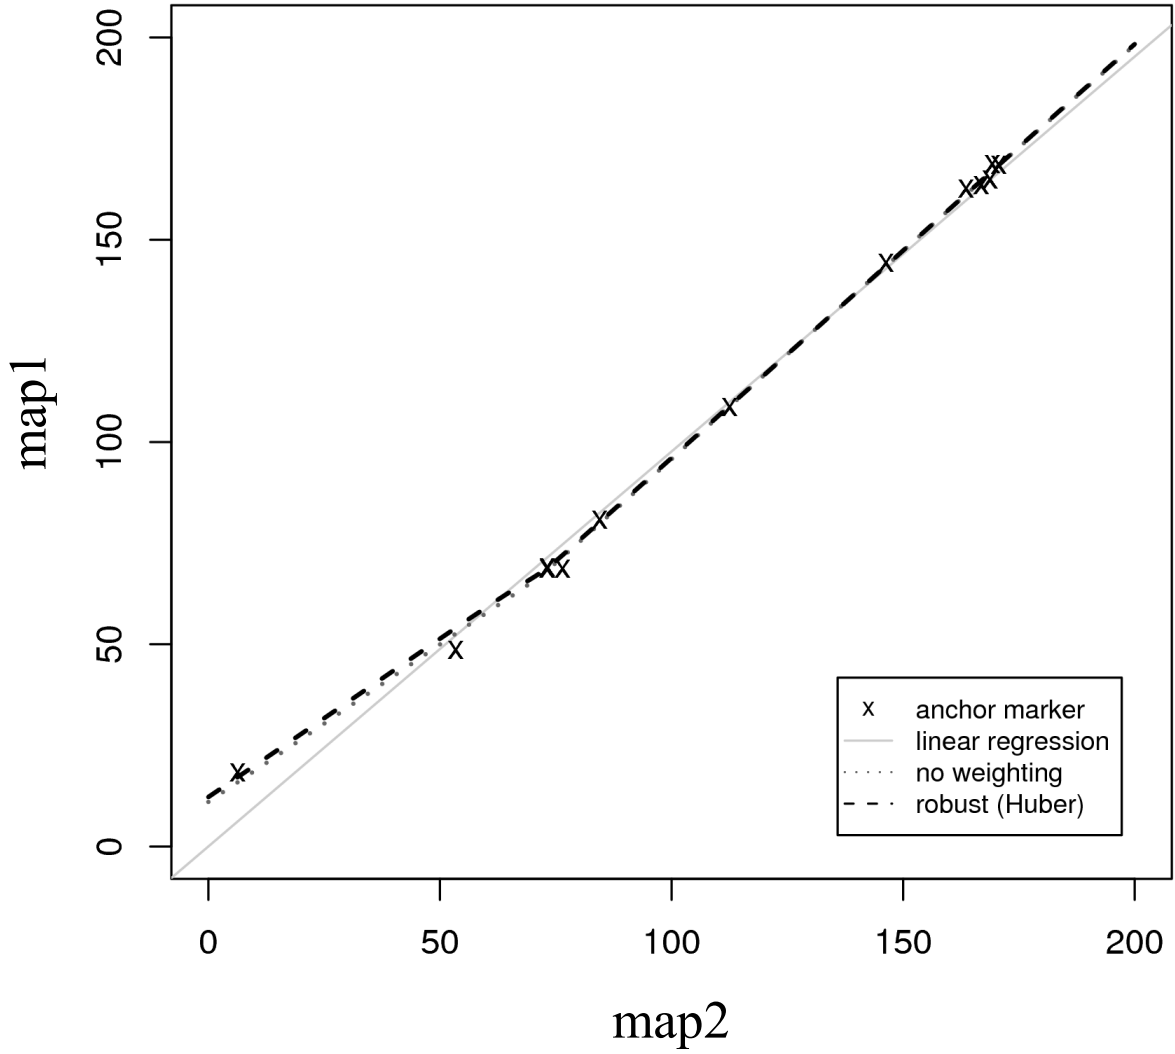

Figure S6 (continued)

# Hv4H

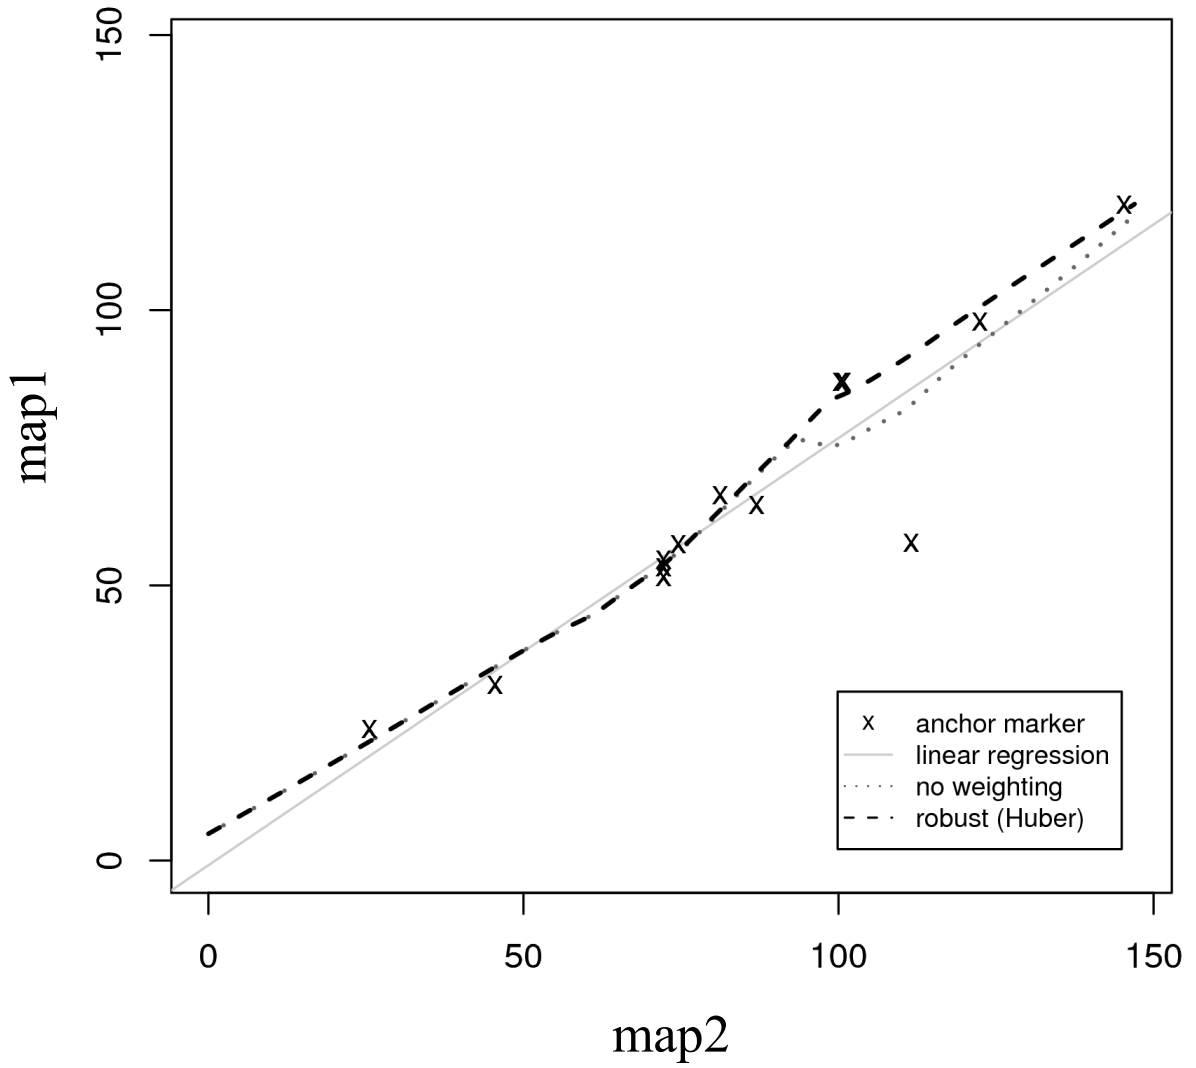

Figure S6 (continued)

# Hv5H

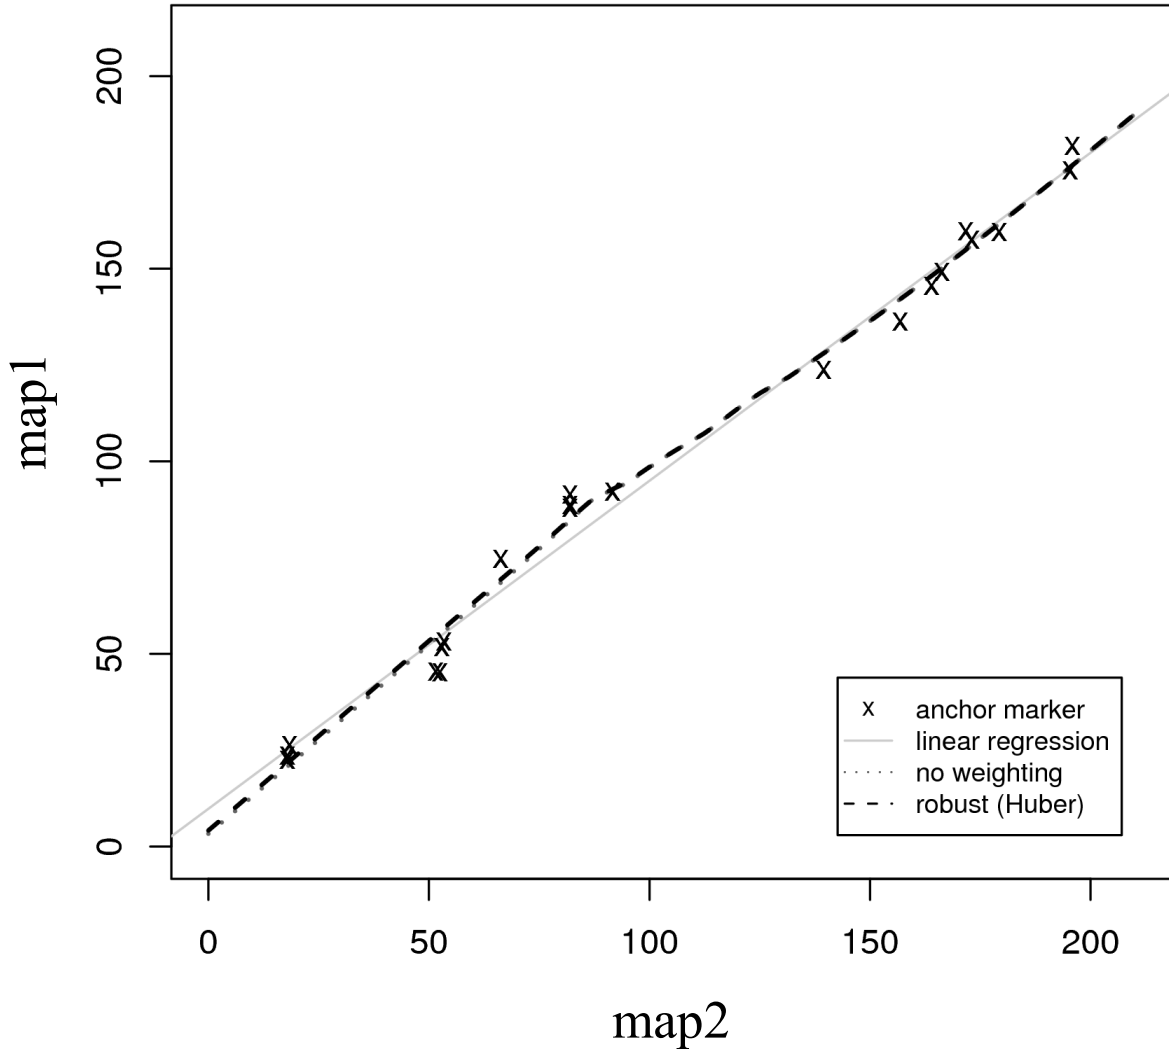

Figure S6 (continued)

# Hv6H

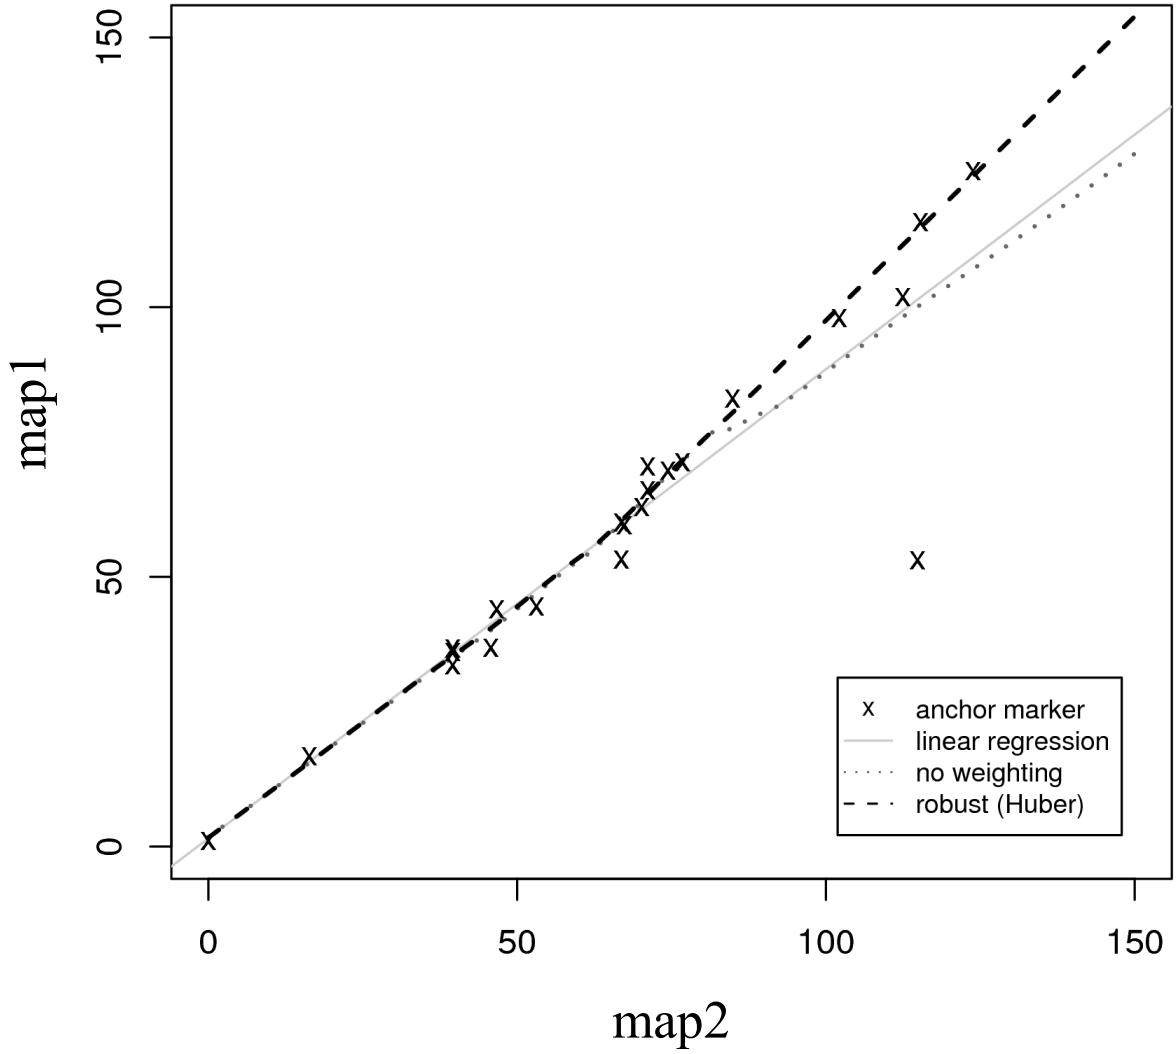

Figure S6 (continued)



# Hv7H

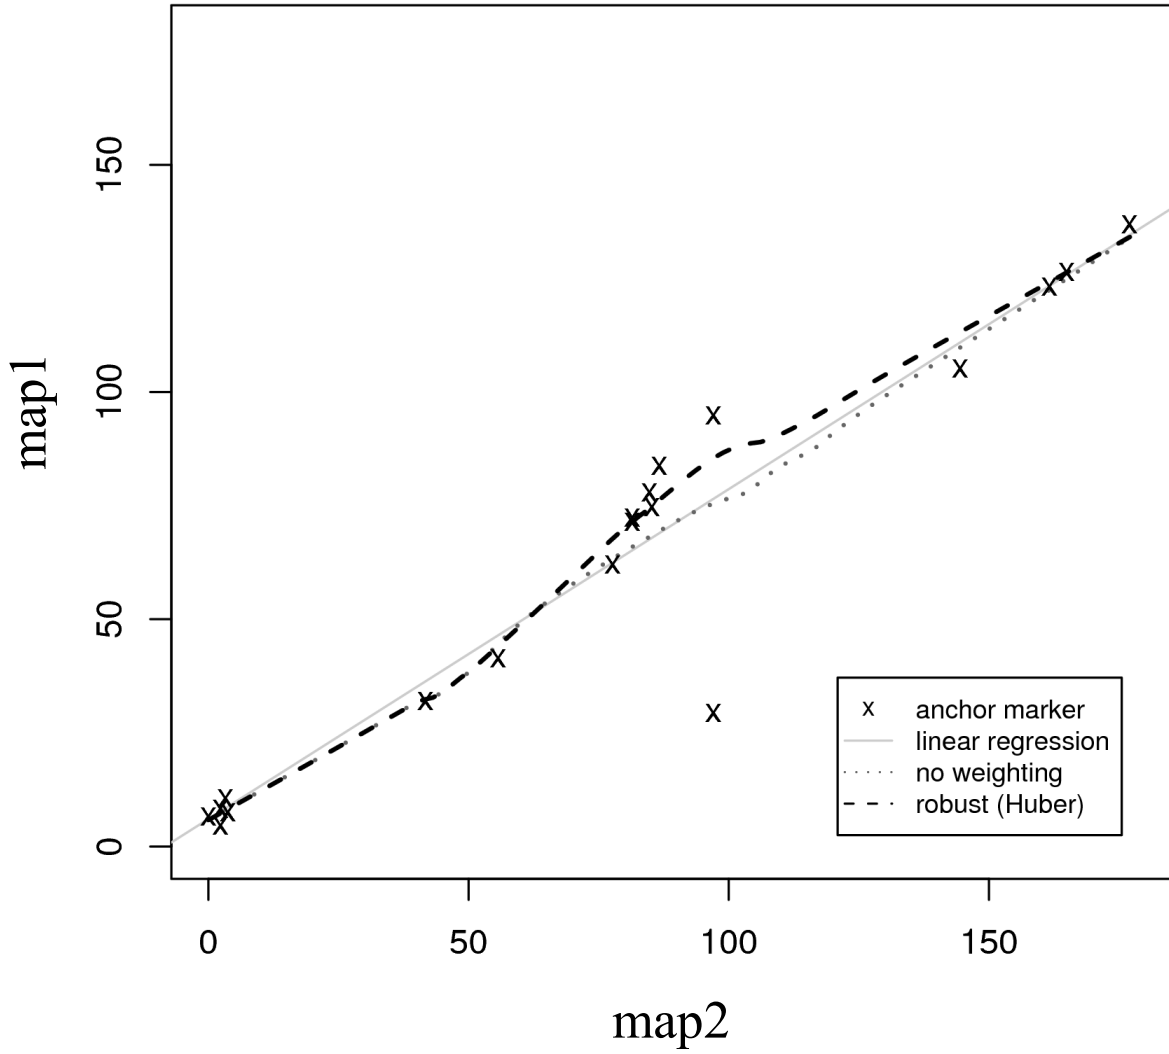

Figure S6 (continued)
